# Supplementary material for: Three New Multiflorane-Type Triterpenes from Pumpkin (Cucurbita maxima) Seeds
Source: PubMed Central journal article supplement (PMC6270121; doi:10.3390/molecules18055568), 2013-05-14

## Supplementary Materials

**Figure S1.**  $^1\text{H}$ -NMR spectrum of compound **1**.

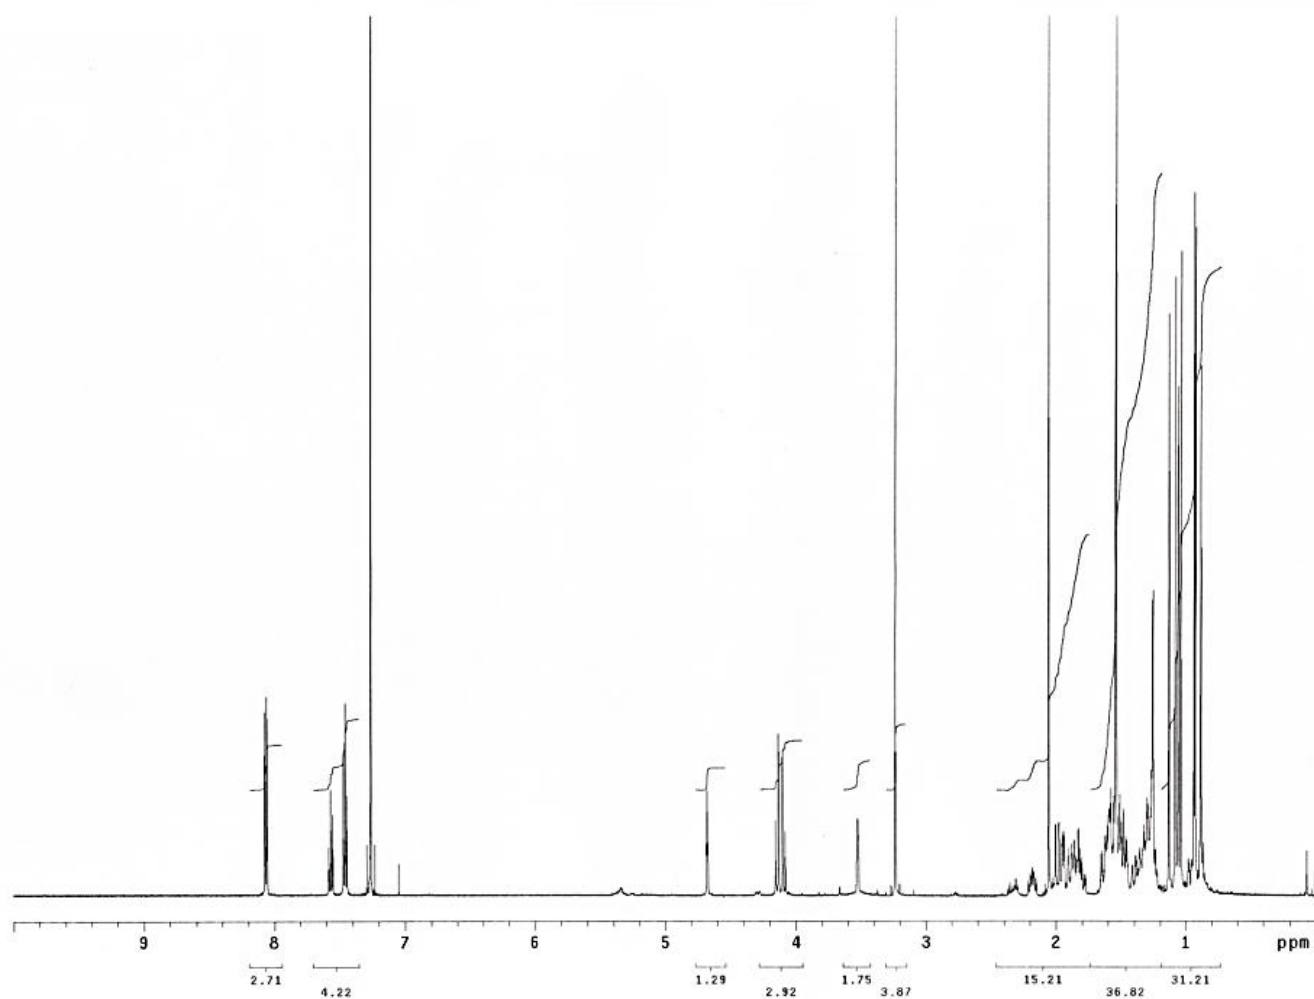

Figure S2.  $^{13}\text{C}$ -NMR spectrum of compound 1.

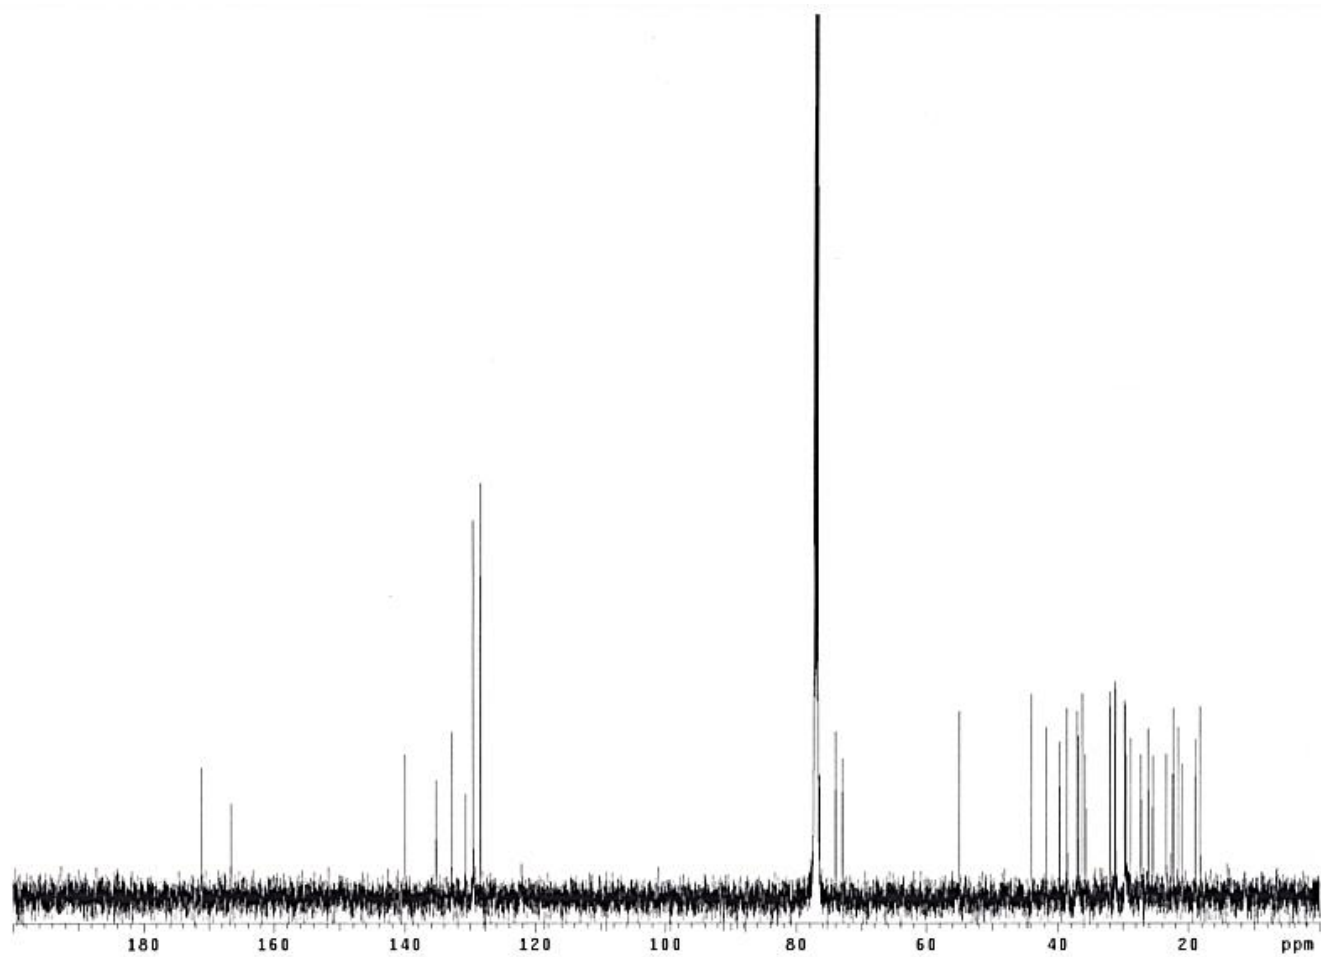

Figure S3. HSQC spectrum of compound 1.

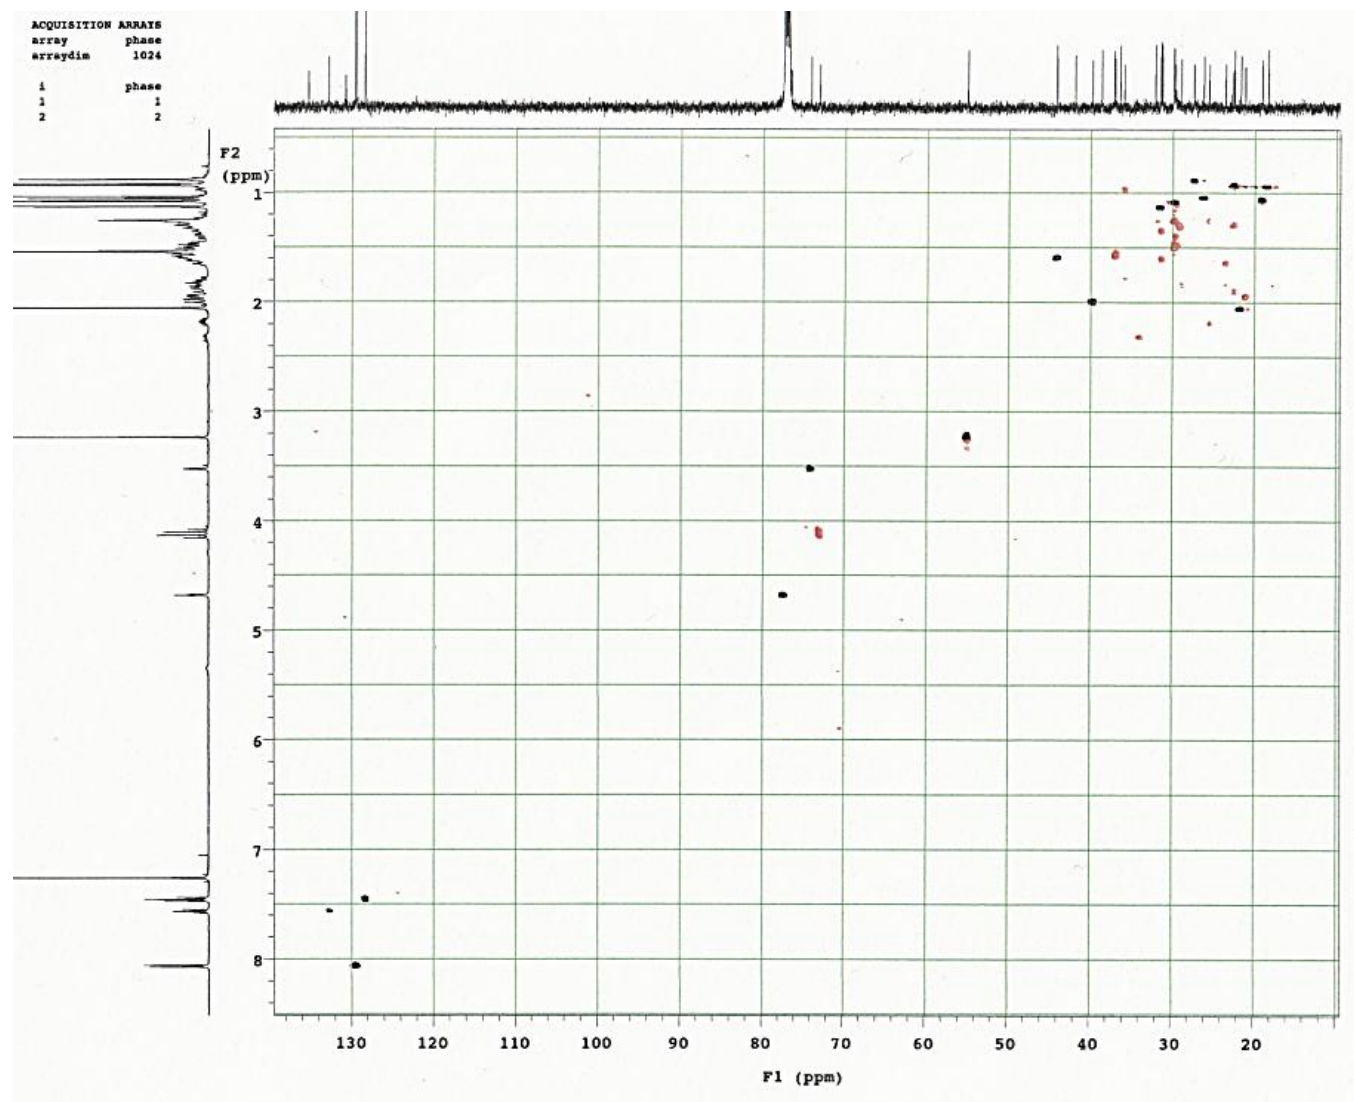

Figure S4. HMBC spectrum of compound 1.

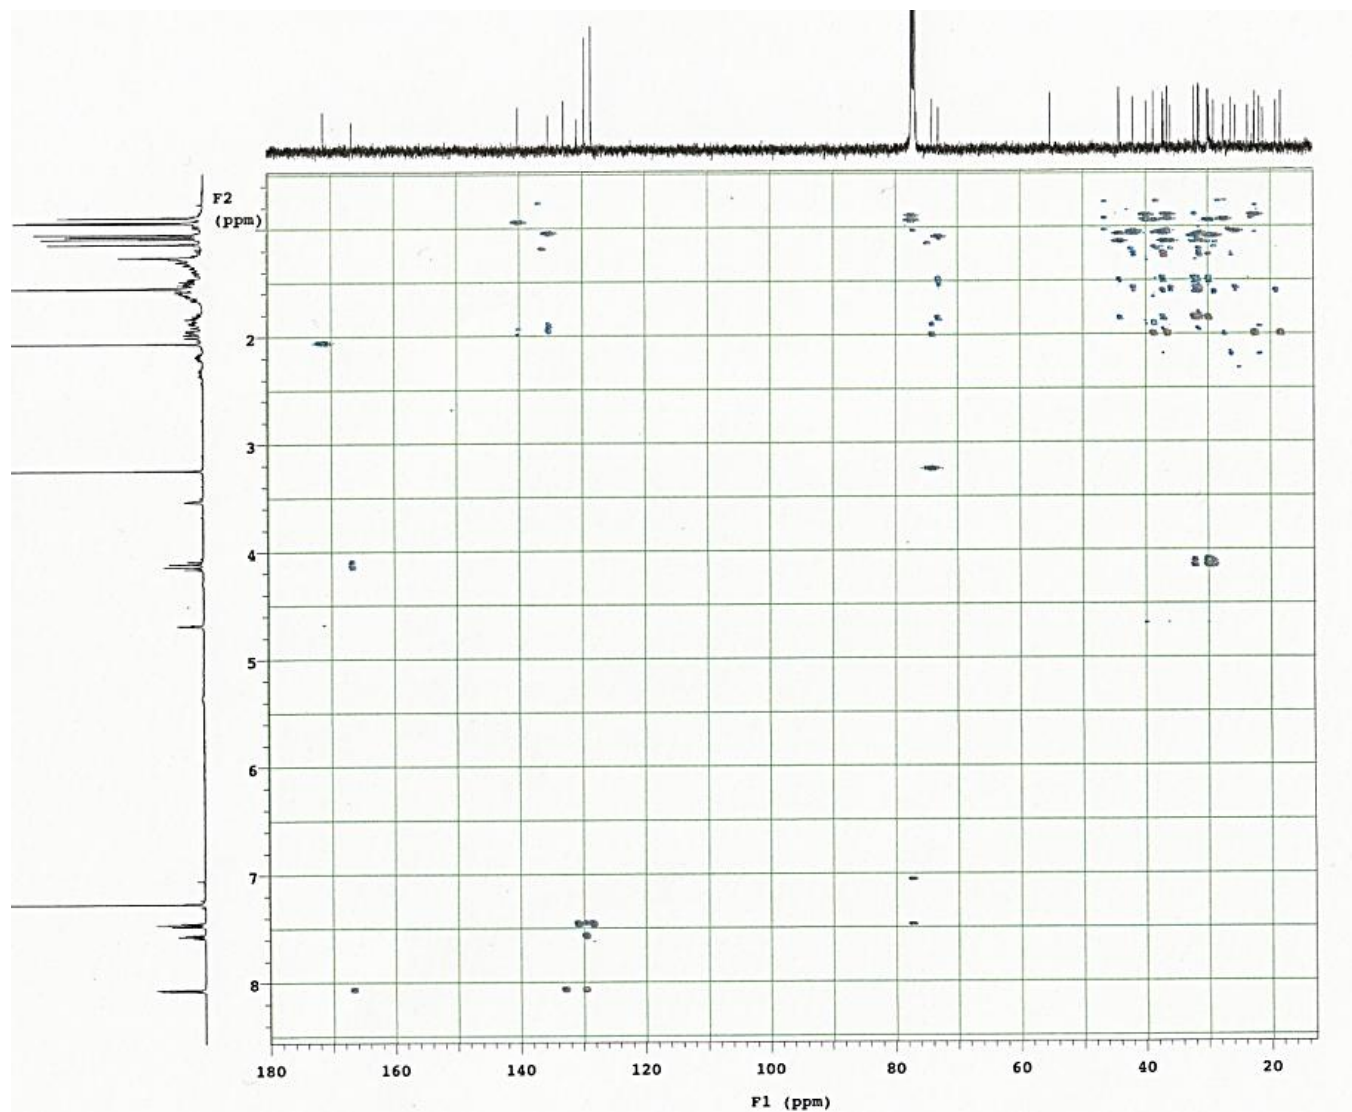

Figure S5.  $^1\text{H}$ - $^1\text{H}$  COSY spectrum of compound 1.

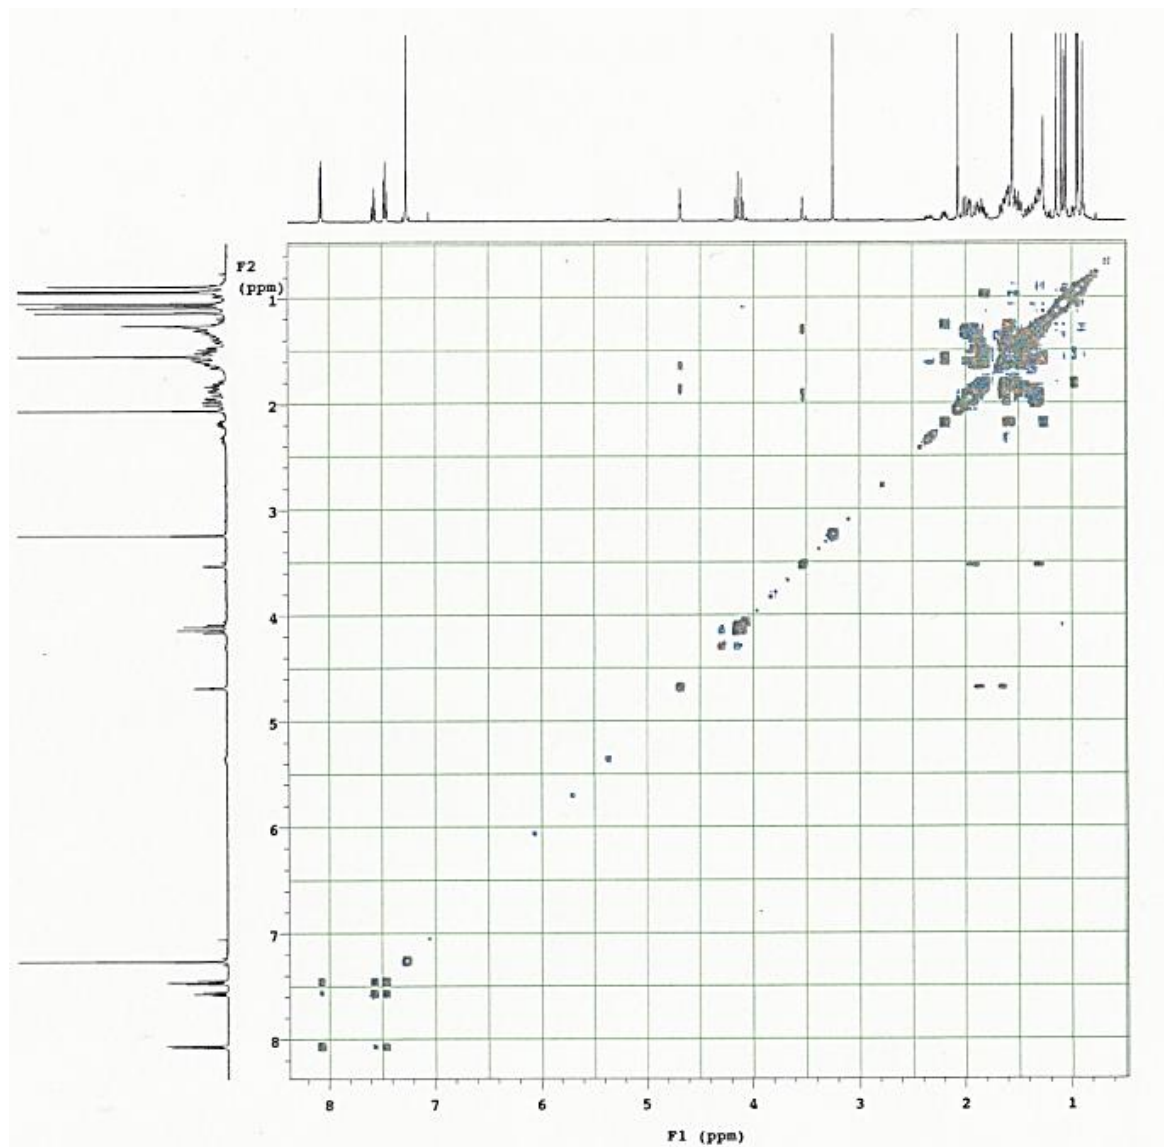

Figure S6. NOESY spectrum of compound 1.

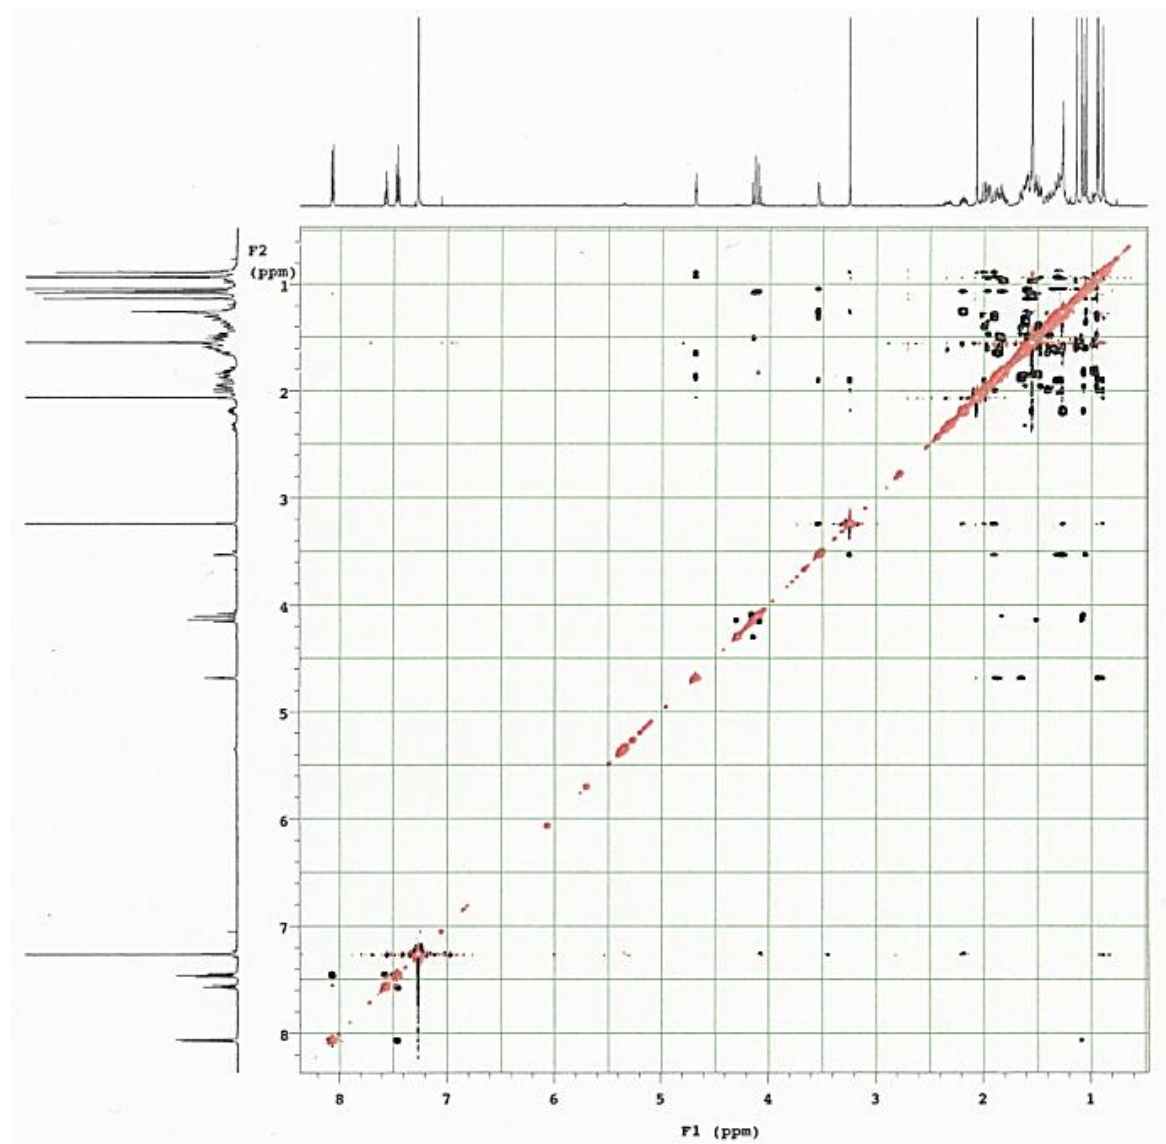

Figure S7. EIMS of compound 1.

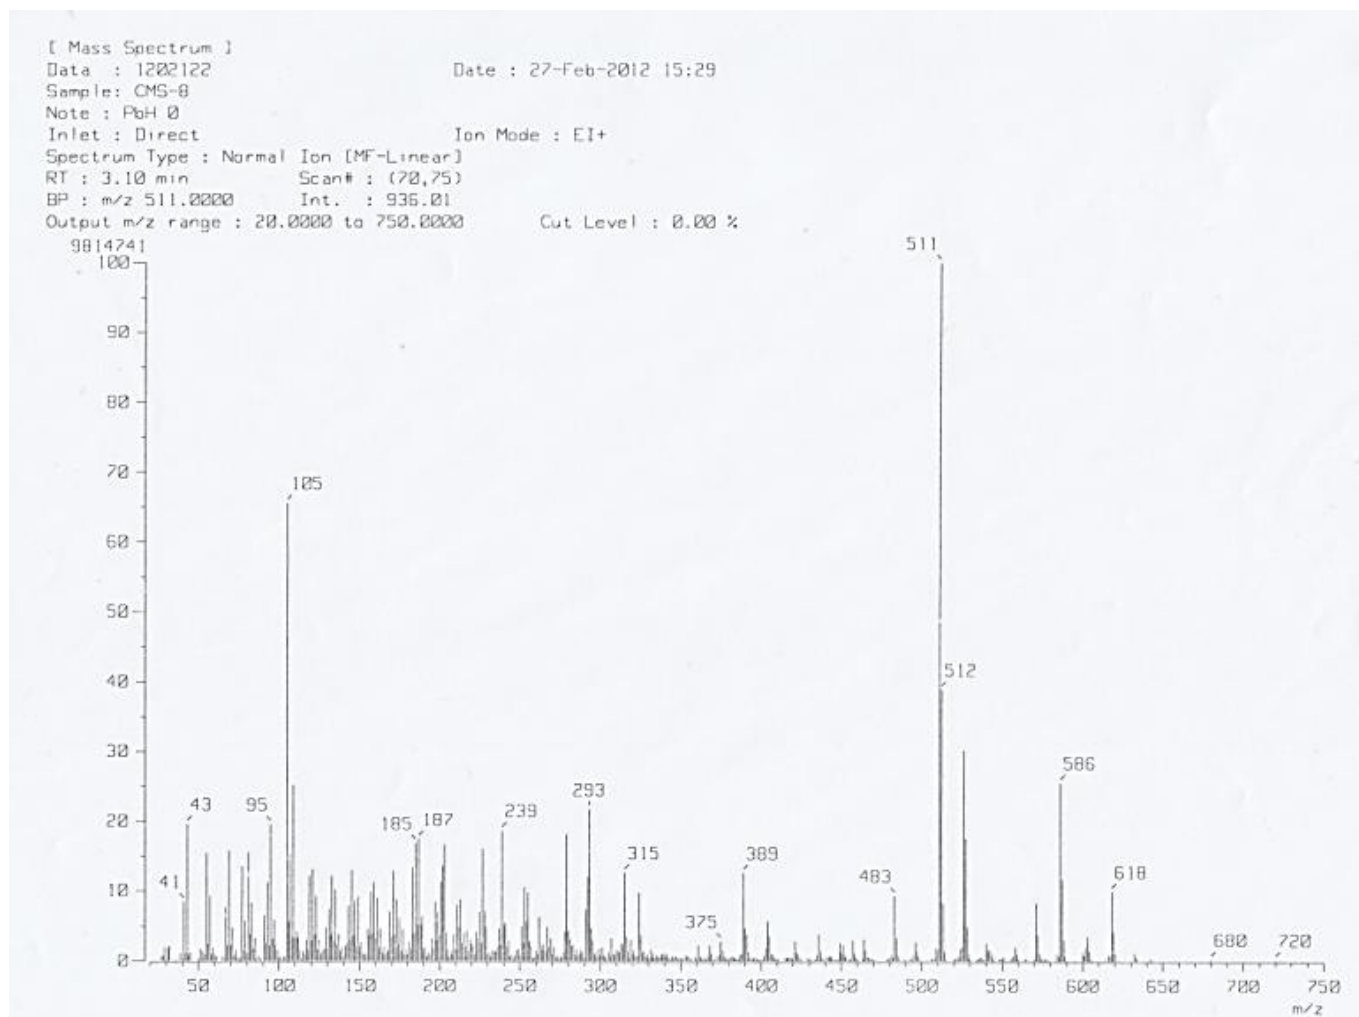

Figure S8. HREIMS of compound 1.

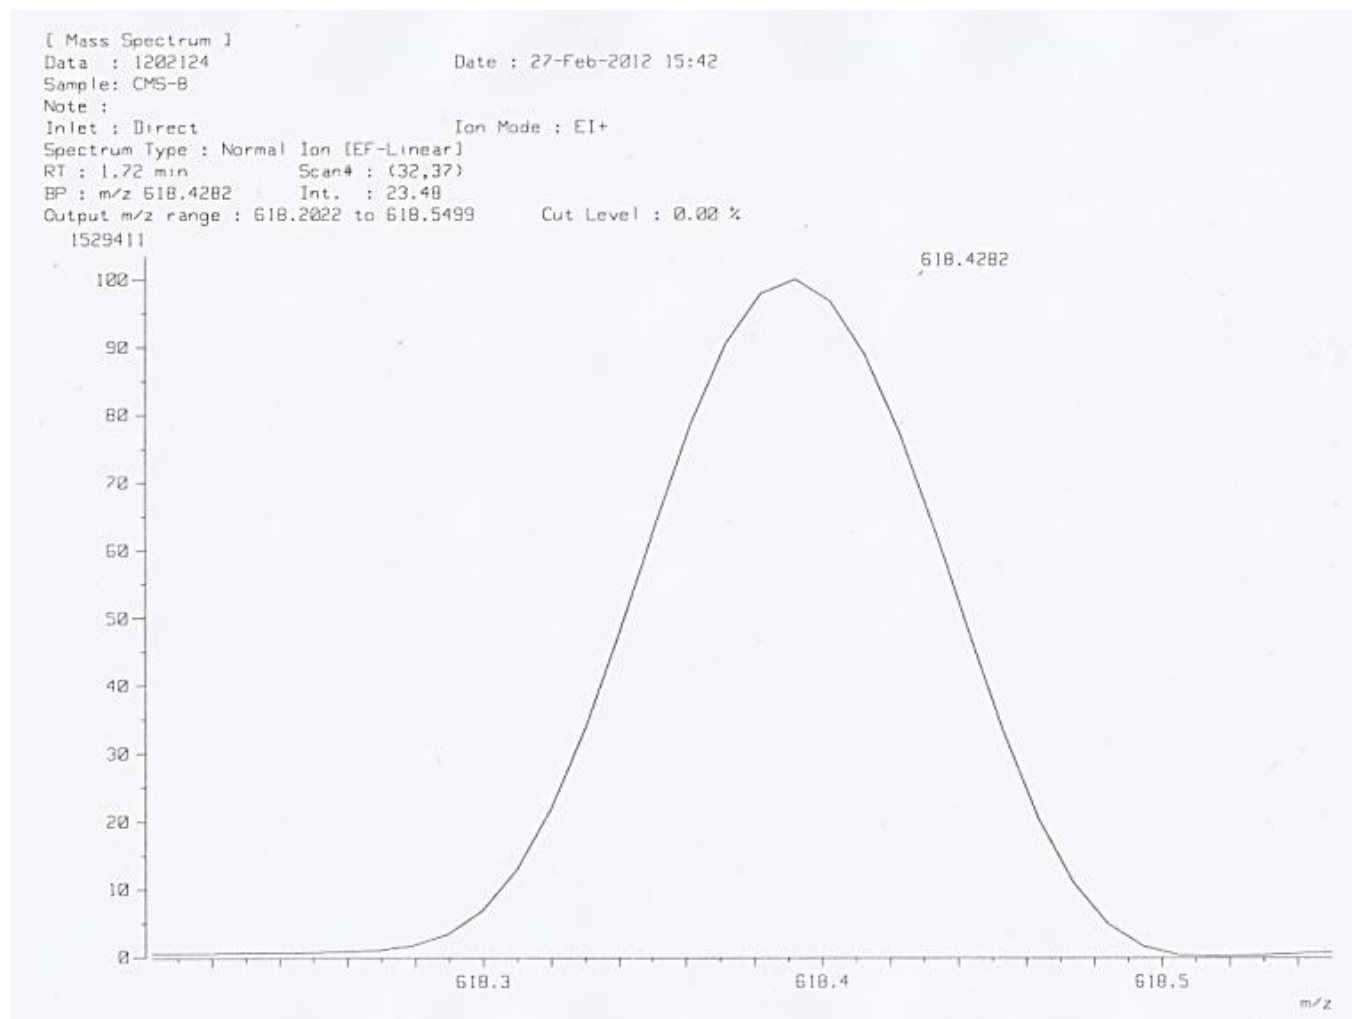



**Table S1.**  $^1\text{H}$  (500 MHz) and  $^{13}\text{C}$  (125 MHz),  $^1\text{H}$ - $^1\text{H}$  COSY, NOESY, and HMBC NMR spectroscopic data of compounds **1**.

| Position |          | $\delta_{\text{H}}$ (J in Hz) | $^1\text{H}$ - $^1\text{H}$ COSY |             |            |            | NOE        |                       | $\delta_{\text{C}}$ , type | HMBC (H to C)         |             |           |             |    |    |
|----------|----------|-------------------------------|----------------------------------|-------------|------------|------------|------------|-----------------------|----------------------------|-----------------------|-------------|-----------|-------------|----|----|
| 1        | $\alpha$ | 1.39, m                       | 1 $\beta$                        | 2 $\alpha$  | 2 $\beta$  | 5 $\alpha$ |            | 29.7, CH <sub>2</sub> | 3                          | 25                    |             |           |             |    |    |
|          | $\beta$  | 1.45, m                       | 1 $\alpha$                       | 2 $\alpha$  | 2 $\beta$  |            |            |                       |                            |                       |             |           |             |    |    |
| 2        | $\alpha$ | 1.64, m                       | 1 $\alpha$                       | 1 $\beta$   | 2 $\beta$  | 3 $\beta$  |            |                       | 23.4, CH <sub>2</sub>      | 1 $\beta$             |             |           |             |    |    |
|          | $\beta$  | 1.85, m                       | 1 $\alpha$                       | 1 $\beta$   | 2 $\alpha$ | 3 $\beta$  | 24         | 25                    |                            |                       |             |           |             |    |    |
| 3        |          | 4.68, t (2.8)                 | 2 $\alpha$                       | 2 $\beta$   |            |            | 23         | 24                    | 77.2, CH                   | 23                    | 24          |           |             |    |    |
| 4        |          |                               |                                  |             |            |            |            |                       | 36.2, C                    | 3                     | 5 $\alpha$  | 23        | 24          |    |    |
| 5        |          | 1.99, dd (12.5, 1.1)          | 6 $\alpha$                       | 6 $\beta$   |            |            | 1 $\alpha$ | 15 $\alpha$           | 23                         | 39.7, CH              | 3           | 24        | 25          |    |    |
| 6        | $\alpha$ | 1.89, m                       | 5 $\alpha$                       | 6 $\beta$   | 7 $\beta$  |            |            |                       |                            | 22.4, CH <sub>2</sub> | 5 $\alpha$  |           |             |    |    |
|          | $\beta$  | 1.30, m                       | 5 $\alpha$                       | 6 $\alpha$  | 7 $\beta$  | 24         | 25         |                       |                            |                       |             |           |             |    |    |
| 7        |          | 3.53, brs                     | 6 $\alpha$                       | 6 $\beta$   |            |            | 15 $\beta$ | 26                    | 74.0, CH                   | 5 $\alpha$            | 6 $\beta$   | 7-OMe     |             |    |    |
| 8        |          |                               |                                  |             |            |            |            |                       | 135.2, C                   | 6 $\beta$             | 11          | 26        |             |    |    |
| 9        |          |                               |                                  |             |            |            |            |                       | 140.0, C                   | 22                    | 25          |           |             |    |    |
| 10       |          |                               |                                  |             |            |            |            |                       | 38.5, C                    | 2 $\alpha$            | 5 $\alpha$  | 6 $\beta$ | 24          | 25 |    |
| 11       |          | 1.95, m                       | 12 $\alpha$                      | 12 $\beta$  |            |            |            |                       | 21.0, CH <sub>2</sub>      |                       |             |           |             |    |    |
| 12       | $\alpha$ | 1.34, m                       | 11                               | 12 $\beta$  |            |            |            |                       | 31.2, CH <sub>2</sub>      |                       |             |           |             |    |    |
|          | $\beta$  | 1.60, m                       | 11                               | 12 $\alpha$ |            |            | 26         |                       |                            |                       |             |           |             |    |    |
| 13       |          |                               |                                  |             |            |            |            |                       | 37.0, C                    | 15 $\alpha$           | 15 $\beta$  | 18        | 19 $\alpha$ | 26 | 27 |
| 14       |          |                               |                                  |             |            |            |            |                       | 41.7, C                    | 15 $\alpha$           | 16          | 26        | 27          |    |    |
| 15       | $\alpha$ | 2.18, m                       | 15 $\alpha$                      | 16          |            |            | 5 $\alpha$ | 27                    | 25.4, CH <sub>2</sub>      | 16                    | 26          |           |             |    |    |
|          | $\beta$  | 1.25, m                       | 15 $\alpha$                      | 16          |            |            | 7 $\beta$  |                       |                            |                       |             |           |             |    |    |
| 16       |          | 1.56, m                       | 15 $\alpha$                      | 15 $\beta$  |            |            |            |                       | 36.9, CH <sub>2</sub>      | 28                    |             |           |             |    |    |
| 17       |          |                               |                                  |             |            |            |            |                       | 31.1, C                    | 15 $\beta$            | 19 $\alpha$ | 28        |             |    |    |
| 18       |          | 1.59, m                       | 19 $\alpha$                      | 19 $\beta$  |            |            | 26         | 28                    | 44.0, CH                   | 19 $\alpha$           | 27          | 28        |             |    |    |
| 19       | $\alpha$ | 1.84, m                       | 18 $\beta$                       | 19 $\beta$  |            |            |            |                       | 28.8, CH <sub>2</sub>      | 18                    | 29a         | 29b       | 30          |    |    |
|          | $\beta$  | 1.30, m                       | 18 $\beta$                       | 19 $\alpha$ |            |            | 28         |                       |                            |                       |             |           |             |    |    |
| 20       |          |                               |                                  |             |            |            |            |                       | 31.9, C                    | 21                    | 29a         | 29b       | 30          |    |    |
| 21       |          | 1.51, m                       | 22 $\alpha$                      | 22 $\beta$  | 27         |            |            |                       | 29.5, CH <sub>2</sub>      | 29a                   | 29b         | 30        |             |    |    |

Table S1. Cont.

| Position                            | $\delta_{\text{H}}$ (J in Hz) | $^1\text{H}$ - $^1\text{H}$ COSY | NOE                             | $\delta_{\text{C}}$ , type | HMBC (H to C)          |
|-------------------------------------|-------------------------------|----------------------------------|---------------------------------|----------------------------|------------------------|
| 22                                  | $\alpha$ 1.79, m              | 21 22 $\alpha$ 22 $\beta$        | 27                              | 35.7, CH <sub>2</sub>      | 18 28                  |
|                                     | $\beta$ 0.97, m               | 21 22 $\alpha$ 22 $\beta$        |                                 |                            |                        |
| 23                                  | 0.88, s                       |                                  | 3 5                             | 27.2, CH <sub>3</sub>      | 5 24                   |
| 24                                  | 0.93, s                       |                                  | 2 $\beta$ 3 6 $\beta$ 25        | 22.3, CH <sub>3</sub>      | 23                     |
| 25                                  | 0.94, s                       |                                  | 2 $\beta$ 6 $\beta$ 26 24       | 18.2, CH <sub>3</sub>      | 5                      |
| 26                                  | 1.04, s                       |                                  | 4 $\beta$ 12 $\beta$ 18 25      | 26.1, CH <sub>3</sub>      | 15 $\alpha$ 15 $\beta$ |
| 27                                  | 1.06, s                       |                                  | 15 $\alpha$ 22 $\alpha$ 29a 29b | 18.9, CH <sub>3</sub>      | 12 $\beta$ 18          |
| 28                                  | 1.13, s                       |                                  | 18 19 $\beta$ 30                | 31.2, CH <sub>3</sub>      |                        |
| 29                                  | a 4.15, d (10.8)              |                                  | 27                              | 73.0, CH <sub>3</sub>      | 19 $\alpha$ 21 30      |
|                                     | b 4.11, d (10.8)              |                                  | 27                              |                            |                        |
| 30                                  | 1.08, s                       |                                  | 28                              | 29.7, CH <sub>3</sub>      | 19 $\alpha$ 29a 29b    |
| 3-O $\underline{\text{C}}\text{O}$  |                               |                                  |                                 | 171.1, C                   | 3 1'                   |
| 1'                                  | 2.06, s                       |                                  |                                 | 21.5, CH <sub>3</sub>      |                        |
| 29-O $\underline{\text{C}}\text{O}$ |                               |                                  |                                 | 166.6, C                   | 29a 29b 2'',6''        |
| 1''                                 |                               |                                  |                                 | 130.7, C                   | 3'', 5''               |
| 2'', 6''                            | 8.06, dd (7.4, 1.3)           | 3'', 5'' 4''                     |                                 | 129.5, CH                  | 2'', 6'' 3'', 5'' 4''  |
| 3'', 5''                            | 7.46, tt (7.4, 1.3)           | 2'', 6'' 4''                     |                                 | 128.3, CH                  | 3'', 5''               |
| 4''                                 | 7.57, tt (7.4, 1.3)           | 2'', 6'' 3'', 5''                |                                 | 132.7, CH                  | 2'', 6''               |
| 7-OMe                               | 3.24, s                       |                                  |                                 | 55.0, CH <sub>3</sub>      |                        |

**Figure S9.**  $^1\text{H-NMR}$  spectrum of compound 2.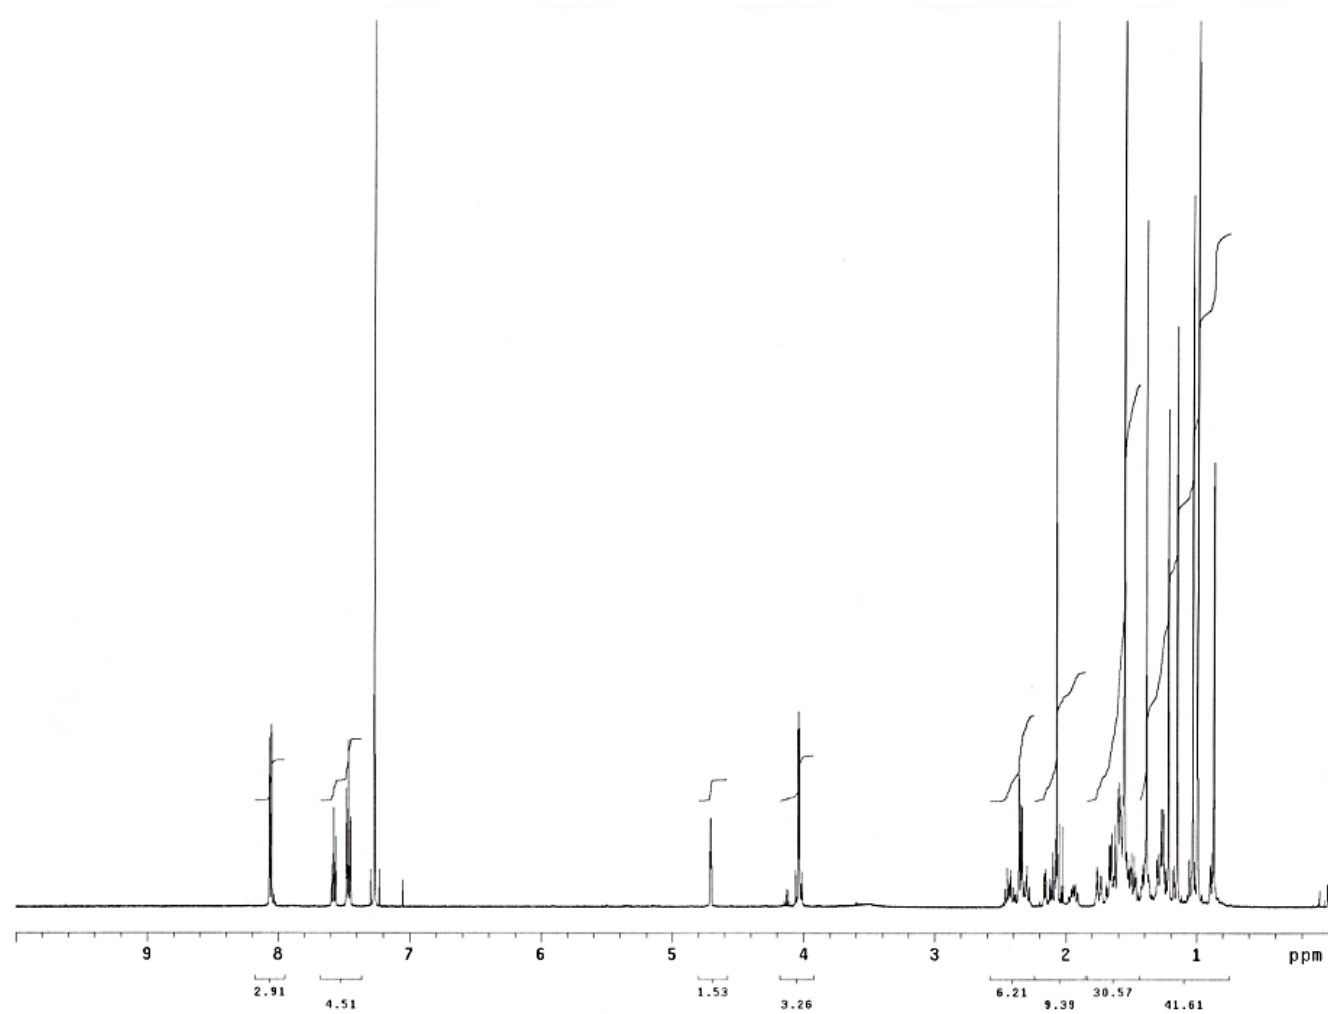

Figure S10.  $^{13}\text{C}$ -NMR spectrum of compound 2.

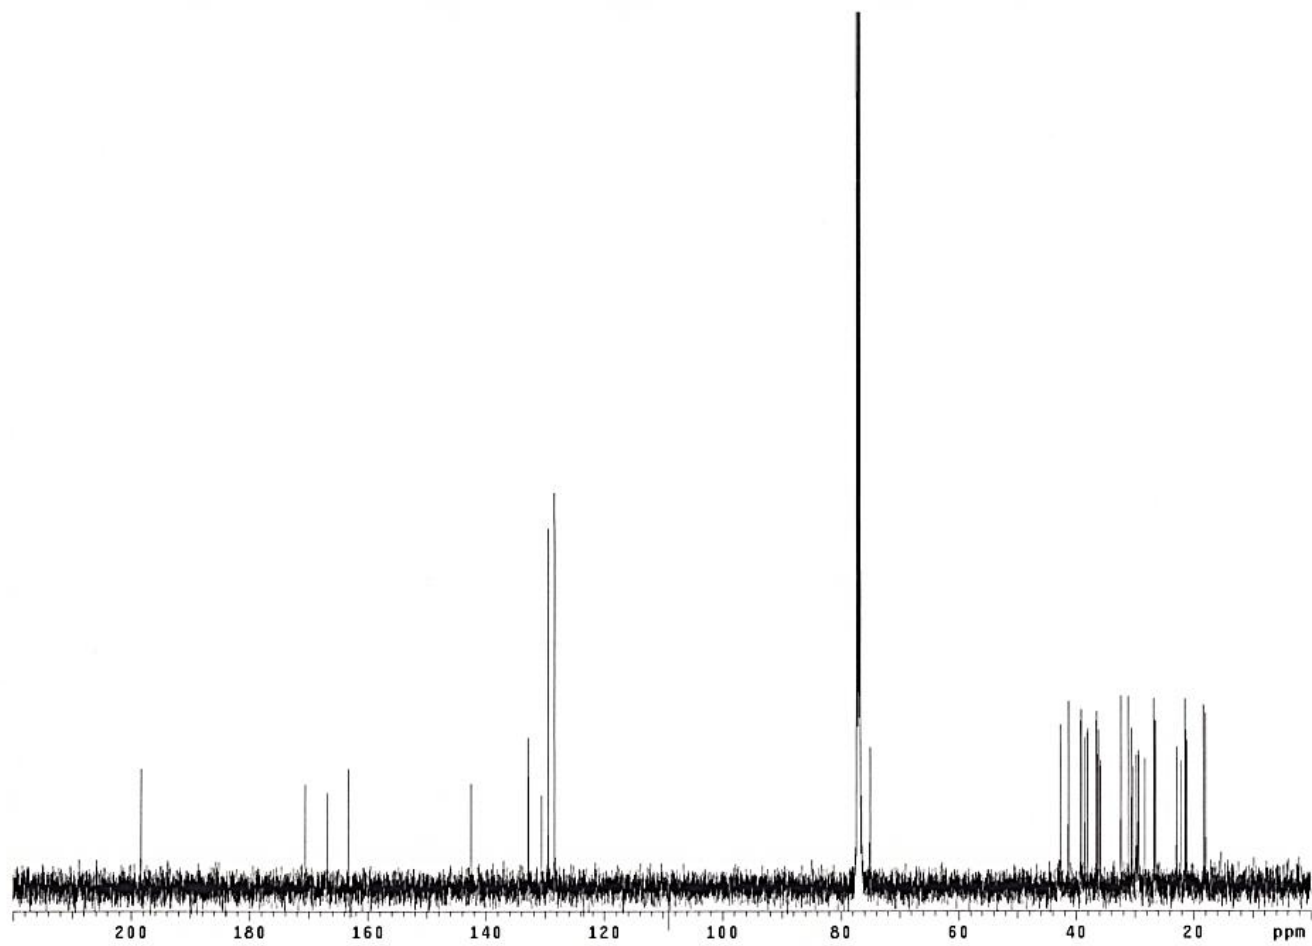

Figure S11. HSQC spectrum of compound 2.

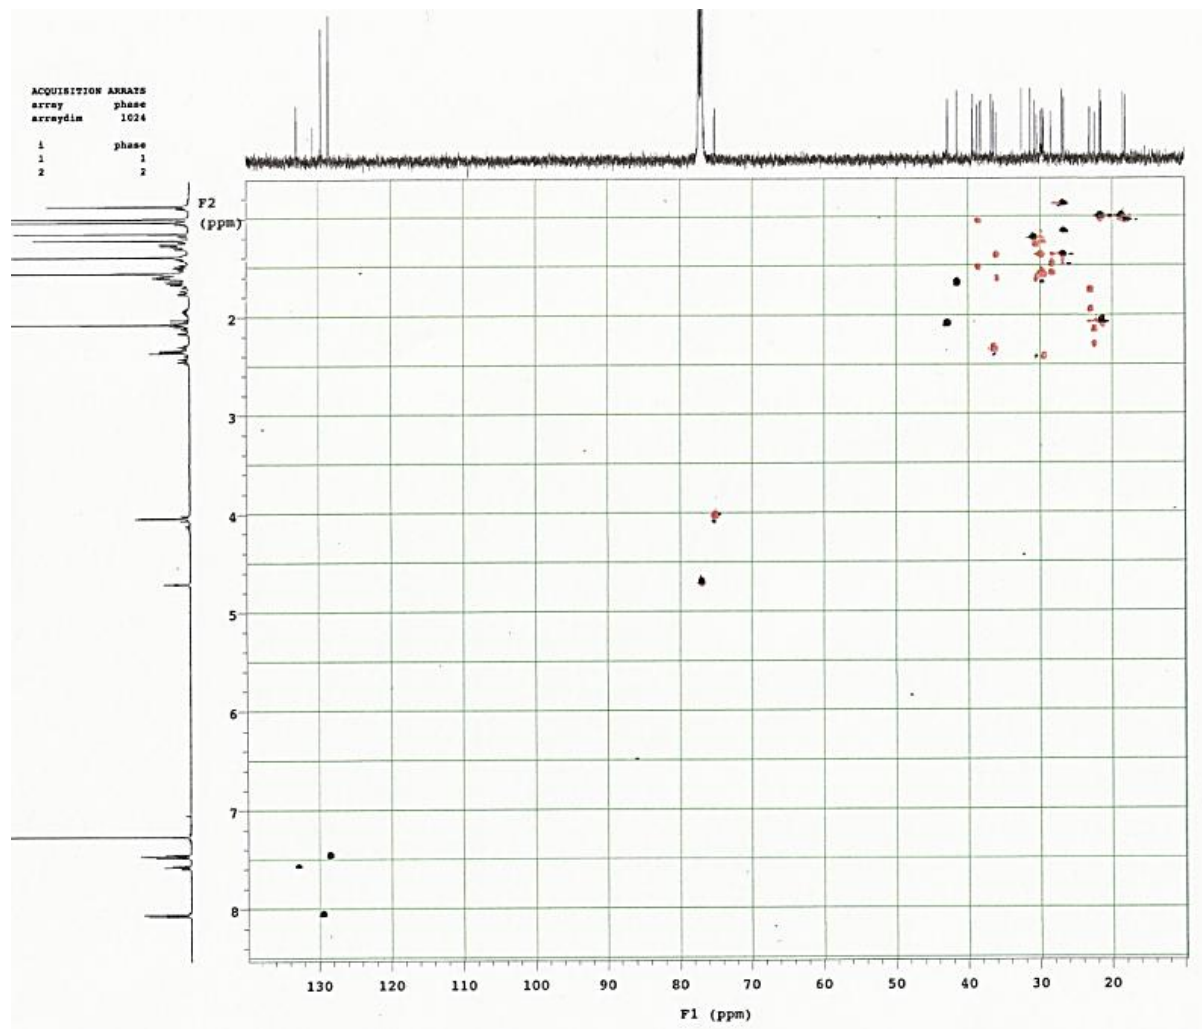

Figure S12. HMBC spectrum of compound 2.

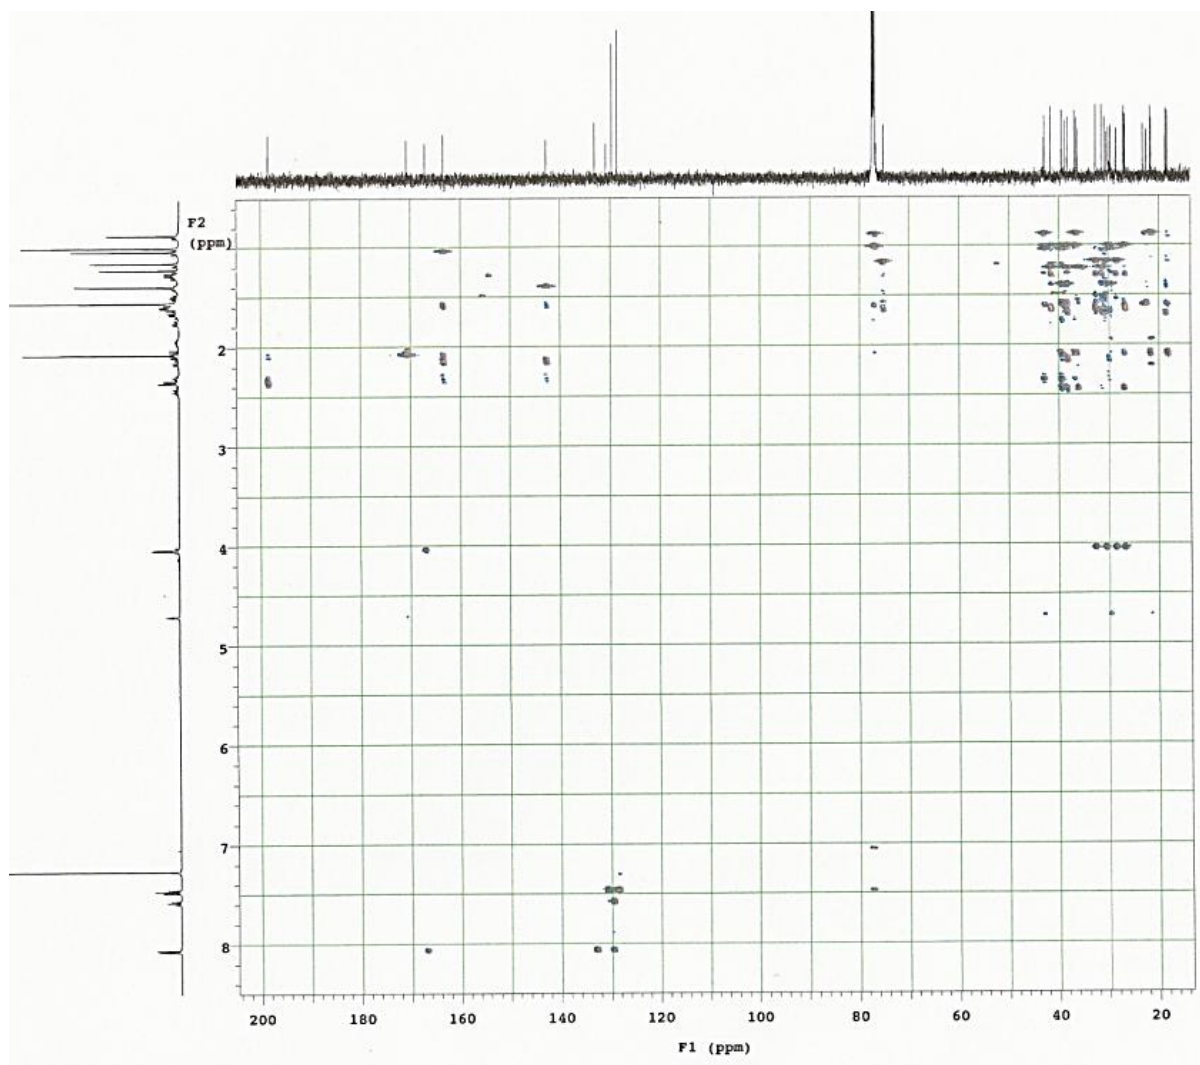

Figure S13.  $^1\text{H}$ - $^1\text{H}$  COSY spectrum of compound 2.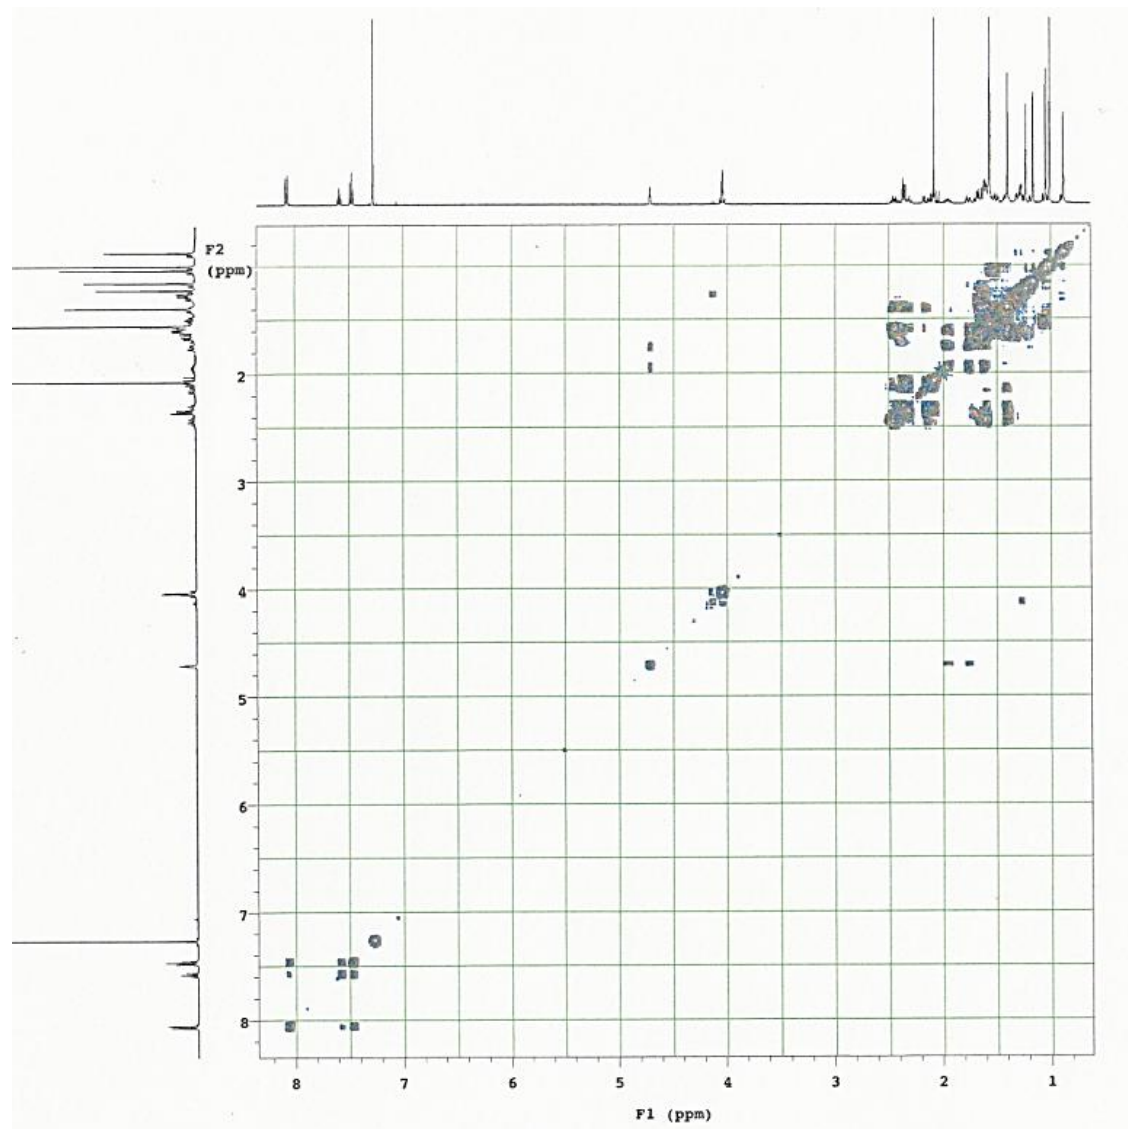

Figure S14. NOESY spectrum of compound 2.

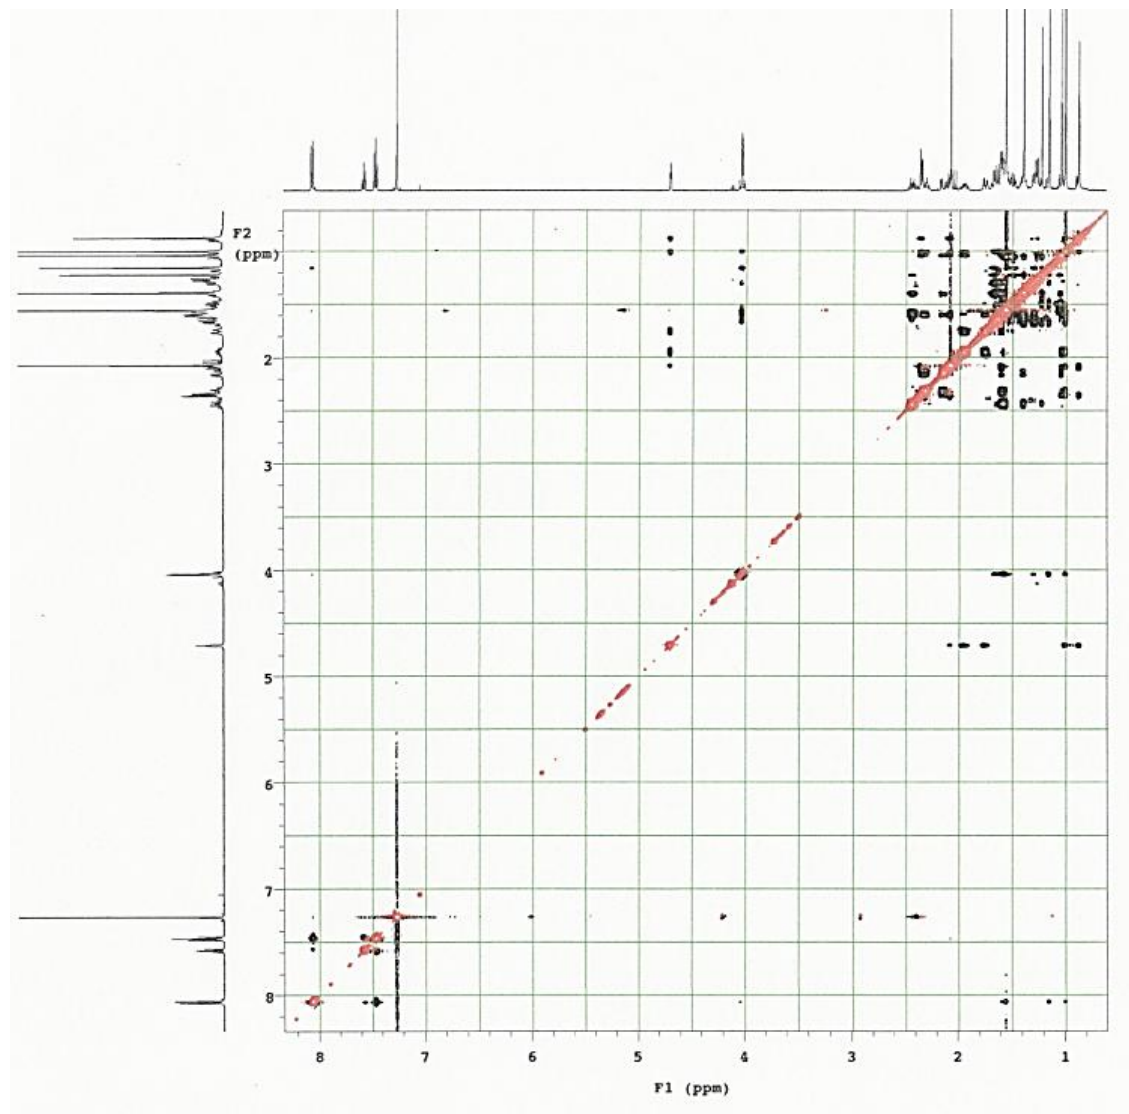



Figure S15. EIMS of compound 2.

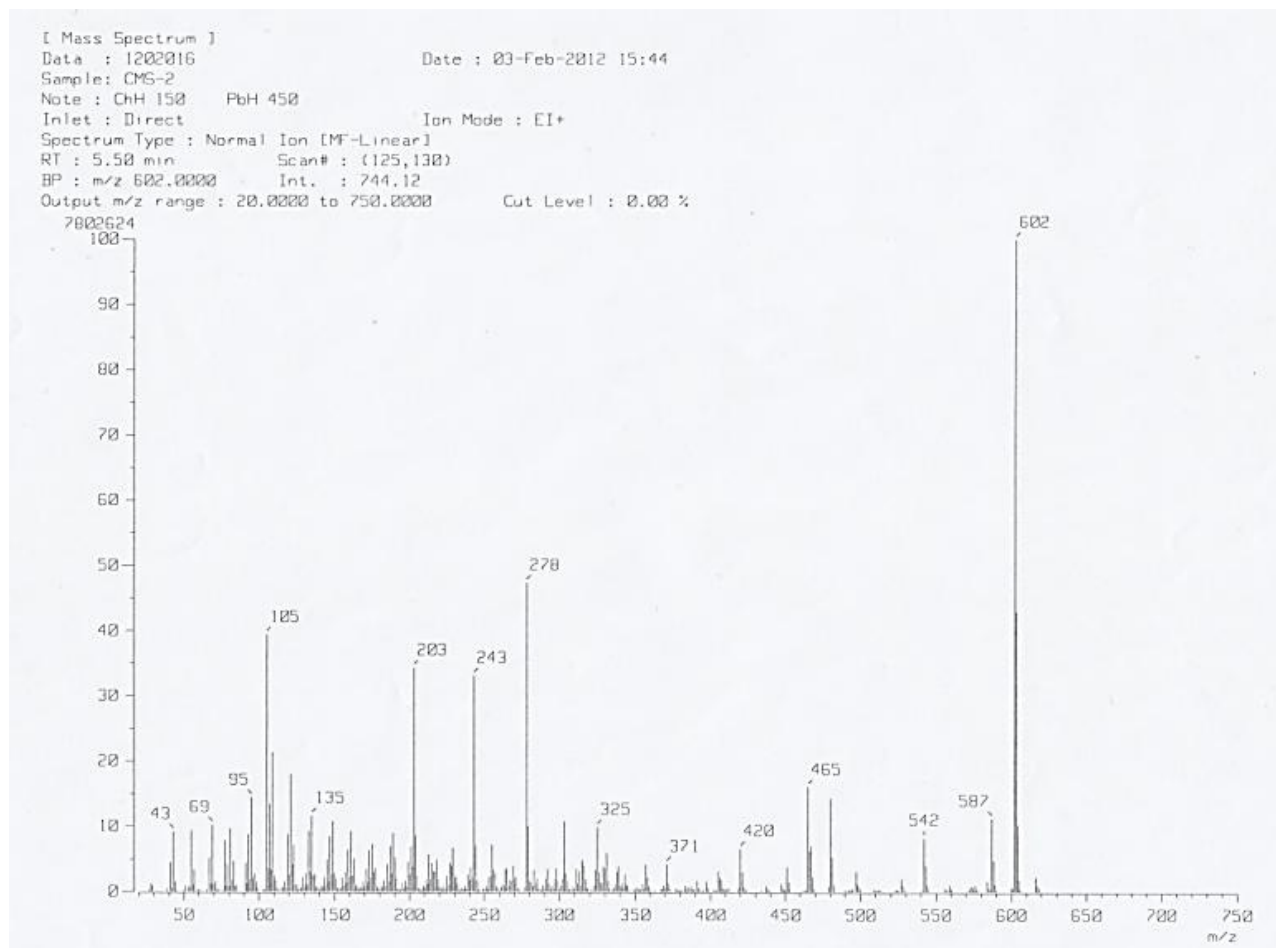

Figure S16. HREIMS of compound 2.

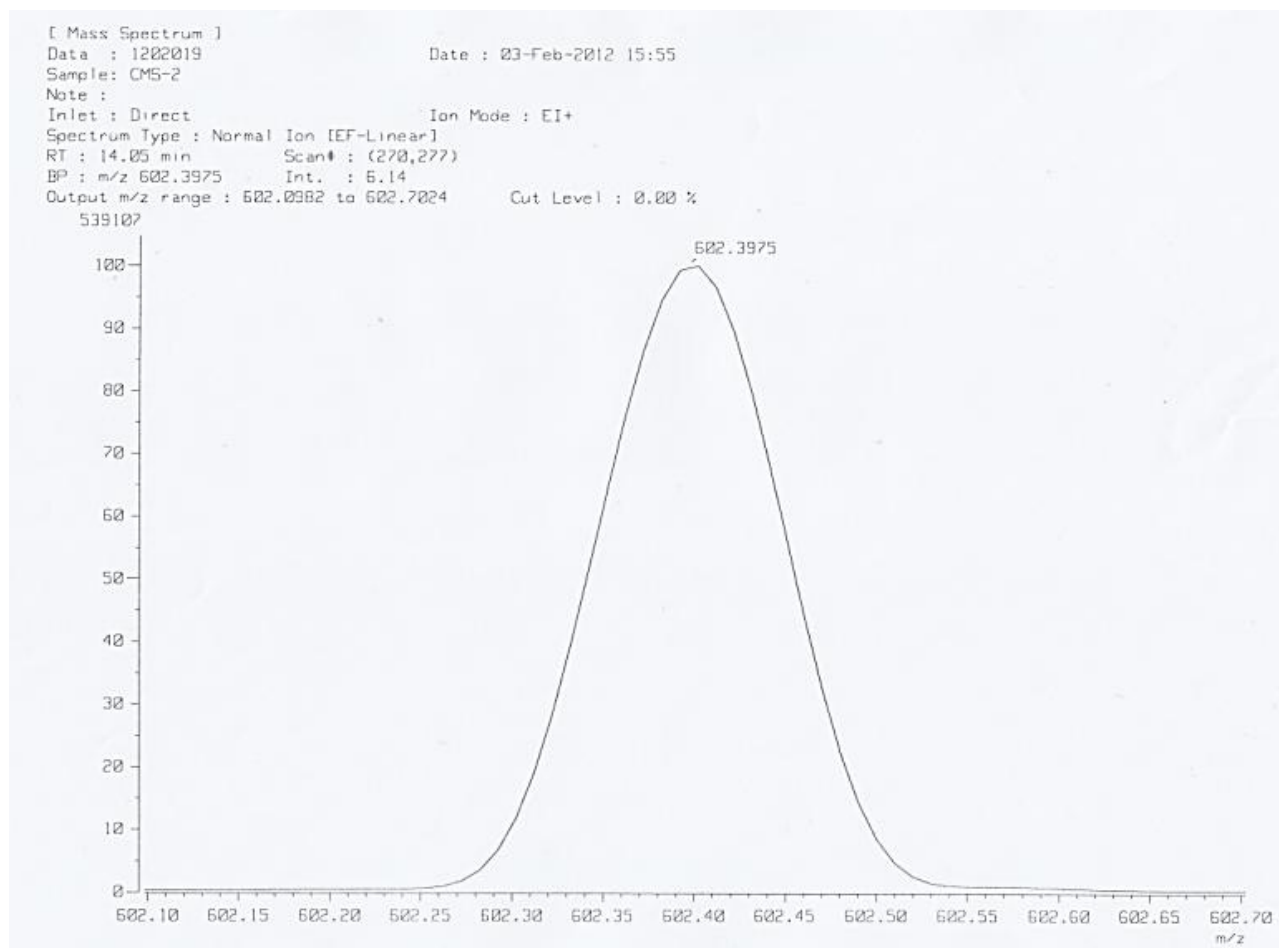

**Table S2.**  $^1\text{H}$  (500 MHz) and  $^{13}\text{C}$  (125 MHz),  $^1\text{H}$ - $^1\text{H}$  COSY, NOESY, and HMBC NMR spectroscopic data of compounds **2**.

| Position |          | $\delta_{\text{H}}$ (J in Hz) | $^1\text{H}$ - $^1\text{H}$ COSY |             |             |           |             | NOE | $\delta_{\text{C}}$ , type | HMBC (H to C) |             |             |             |            |    |    |
|----------|----------|-------------------------------|----------------------------------|-------------|-------------|-----------|-------------|-----|----------------------------|---------------|-------------|-------------|-------------|------------|----|----|
| 1        | $\alpha$ | 1.97, m                       | 1 $\beta$                        | 2 $\alpha$  | 2 $\beta$   | 2'', 6'', |             |     | 31.8, CH <sub>2</sub>      | 3             | 25          |             |             |            |    |    |
|          | $\beta$  | 1.58, m                       | 1 $\alpha$                       | 2 $\alpha$  | 2 $\beta$   | 11        |             |     |                            |               |             |             |             |            |    |    |
| 2        | $\alpha$ | 1.87, m                       | 1 $\alpha$                       | 1 $\beta$   | 2 $\beta$   | 3 $\beta$ |             |     | 23.1, CH <sub>2</sub>      | 1 $\alpha$    |             |             |             |            |    |    |
|          | $\beta$  | 1.98, m                       | 1 $\alpha$                       | 1 $\beta$   | 2 $\alpha$  | 3 $\beta$ | 24 25       |     |                            |               |             |             |             |            |    |    |
| 3        |          | 4.82, brd (3.2)               | 2 $\alpha$                       | 2 $\beta$   |             |           | 23 24       |     | 78.8, CH                   | 1 $\beta$     | 23          | 24          |             |            |    |    |
| 4        |          |                               |                                  |             |             |           |             |     | 37.6, C                    | 3 $\beta$     | 5 $\alpha$  | 23          | 24          |            |    |    |
| 5        |          | 1.94, m                       | 6 $\alpha$                       | 6 $\beta$   |             |           | 27          |     | 43.9, CH                   | 1 $\beta$     | 3 $\beta$   | 6 $\alpha$  | 7           | 23         | 24 | 25 |
| 6        | $\alpha$ | 2.14, brt (5.0)               | 5 $\alpha$                       | 6 $\beta$   | 7           |           | 23          |     | 23.7, CH <sub>2</sub>      | 5 $\alpha$    |             |             |             |            |    |    |
|          | $\beta$  | 2.08, m                       | 5 $\alpha$                       | 6 $\alpha$  | 7           |           | 24 25       |     |                            |               |             |             |             |            |    |    |
| 7        |          | 5.06, brd (5.9)               | 6 $\alpha$                       | 6 $\beta$   |             |           | 15 $\beta$  |     | 119.4, CH                  | 5 $\alpha$    | 6 $\alpha$  | 6 $\beta$   |             |            |    |    |
| 8        |          |                               |                                  |             |             |           |             |     | 142.3, C                   | 6 $\alpha$    | 11          | 15 $\alpha$ | 15 $\beta$  | 26         |    |    |
| 9        |          |                               |                                  |             |             |           |             |     | 145.8, C                   | 7             | 25          |             |             |            |    |    |
| 10       |          |                               |                                  |             |             |           |             |     | 36.4, C                    | 1 $\beta$     | 2 $\alpha$  | 2 $\beta$   | 5 $\alpha$  | 6 $\alpha$ | 11 | 25 |
| 11       |          | 5.29, brd (5.9)               | 12 $\alpha$                      | 12 $\beta$  |             |           | 1 $\beta$   |     | 114.8, CH                  | 12 $\alpha$   |             |             |             |            |    |    |
| 12       | $\alpha$ | 2.08, m                       | 11                               | 12 $\beta$  |             |           | 19 $\alpha$ |     | 39.1, CH <sub>2</sub>      | 18 $\beta$    |             |             |             |            |    |    |
|          | $\beta$  | 1.79, m                       | 11                               | 12 $\alpha$ |             |           | 18 $\beta$  | 26  |                            |               |             |             |             |            |    |    |
| 13       |          |                               |                                  |             |             |           |             |     | 37.5, C                    | 11            | 12 $\alpha$ | 18 $\beta$  | 19 $\alpha$ | 26         | 27 |    |
| 14       |          |                               |                                  |             |             |           |             |     | 40.4, C                    | 12 $\alpha$   | 15 $\alpha$ | 26          | 27          |            |    |    |
| 15       | $\alpha$ | 1.63, m                       | 15 $\beta$                       | 15 $\alpha$ | 16 $\beta$  |           | 27          |     | 27.6, CH <sub>2</sub>      | 16 $\alpha$   |             |             |             |            |    |    |
|          | $\beta$  | 1.42, m                       | 16 $\alpha$                      | 16 $\beta$  | 15 $\alpha$ |           | 7           |     |                            |               |             |             |             |            |    |    |
| 16       | $\alpha$ | 1.76, m                       | 15 $\alpha$                      | 15 $\beta$  | 16 $\beta$  |           |             |     | 37.2, CH <sub>2</sub>      | 15 $\alpha$   |             |             |             |            |    |    |
|          | $\beta$  | 1.49, m                       | 15 $\alpha$                      | 15 $\beta$  | 16 $\alpha$ |           |             |     |                            |               |             |             |             |            |    |    |
| 17       |          |                               |                                  |             |             |           |             |     | 31.9, C                    | 28            |             |             |             |            |    |    |
| 18       |          | 1.68, m                       | 19 $\alpha$                      | 19 $\beta$  |             |           | 12 $\beta$  | 26  | 45.1, CH                   | 16 $\alpha$   | 19 $\alpha$ | 27          | 28          |            |    |    |
| 19       | $\alpha$ | 1.76, m                       | 18 $\beta$                       | 19 $\beta$  |             |           | 12 $\alpha$ |     | 29.6, CH <sub>2</sub>      | 18 $\beta$    |             |             |             |            |    |    |
|          | $\beta$  | 1.30, m                       | 18 $\beta$                       | 19 $\alpha$ |             |           |             |     |                            |               |             |             |             |            |    |    |
| 20       |          |                               |                                  |             |             |           |             |     | 29.9, C                    | 29a           | 29b         | 30          |             |            |    |    |
| 21       |          | 1.63, m                       | 22 $\alpha$                      | 22 $\beta$  |             |           |             |     | 30.1, CH <sub>2</sub>      | 19 $\alpha$   | 22 $\alpha$ | 29a         | 29b         | 30         |    |    |

Table S2. Cont.

| Position                    | $\delta_{\text{H}}$ (J in Hz) | $^1\text{H}$ - $^1\text{H}$ COSY | NOE                                 | $\delta_{\text{C}}$ , type | HMBC (H to C)                     |
|-----------------------------|-------------------------------|----------------------------------|-------------------------------------|----------------------------|-----------------------------------|
| 22                          | $\alpha$ 1.89, m              | 21 22 $\beta$                    |                                     | 33.0, CH <sub>2</sub>      | 16 $\alpha$ 18 $\beta$ 21 28      |
|                             | $\beta$ 0.95, m               | 21 22 $\alpha$                   | 26                                  |                            |                                   |
| 23                          | 0.90, s                       |                                  | 3 $\beta$ 6 $\alpha$ 25             | 28.0, CH <sub>3</sub>      | 3 $\beta$ 5 $\alpha$ 24           |
| 24                          | 1.03, s                       |                                  | 2 $\beta$ 3 $\beta$ 6 $\beta$ 23    | 21.6, CH <sub>3</sub>      | 3 $\beta$ 23                      |
| 25                          | 1.01, s                       |                                  | 2 $\beta$ 6 $\beta$ 24 26           | 21.1, CH <sub>3</sub>      | 1 $\beta$ 5 $\alpha$              |
| 26                          | 0.94, s                       |                                  | 12 $\beta$ 18 $\beta$ 22 $\beta$ 25 | 21.2, CH <sub>3</sub>      | 15 $\alpha$                       |
| 27                          | 1.03, s                       |                                  | 5 $\alpha$ 15 $\alpha$ 29a 29b      | 19.9, CH <sub>3</sub>      | 12 $\alpha$ 12 $\beta$ 18 $\beta$ |
| 28                          | 1.11, s                       |                                  |                                     | 31.4, CH <sub>3</sub>      | 16 $\alpha$ 18 $\beta$            |
| 29                          | a 4.34, d (10.7)              | 29b                              | 27                                  | 74.2, CH <sub>2</sub>      | 19 $\alpha$ 21 30                 |
|                             | b 4.12, d (10.8)              | 29a                              | 27                                  |                            |                                   |
| 30                          | 1.16, s                       |                                  |                                     | 31.3, CH <sub>3</sub>      | 29a 29b                           |
| 3-O $\overline{\text{CO}}$  |                               |                                  |                                     | 171.1, C                   | 3 1'                              |
| 1'                          |                               |                                  |                                     | 123.1, C                   | 3', 5'                            |
| 2',6'                       | 7.85, dd (8.4, 2.8)           | 3', 5'                           | 1 $\alpha$                          | 131.9, CH                  | 2',6'                             |
| 3', 5'                      | 6.84, dd (8.4, 2.8)           | 2',6'                            |                                     | 115.3, CH                  | 3', 5' 4''-OH                     |
| 29-O $\overline{\text{CO}}$ |                               |                                  |                                     | 168.5, C                   | 29a 29b 2'', 6''                  |
| 1''                         |                               |                                  |                                     | 130.2, C                   | 2'', 6''                          |
| 2'', 6''                    | 8.04, dd (7.4, 1.4)           | 3'', 5'' 4''                     |                                     | 129.6, CH                  | 2'', 6'' 3'', 5''                 |
| 3'', 5''                    | 7.46, tt (7.4, 1.4)           | 4'' 2'', 6''                     |                                     | 128.8, CH                  | 2'', 6''                          |
| 4''                         | 7.56, tt (7.4, 1.4)           | 3'', 5'' 2'', 6''                |                                     | 133.6, CH                  | 2'', 6''                          |
| 4''-OMe                     | 7.49, brs                     |                                  |                                     |                            |                                   |

**Figure S17.**  $^1\text{H-NMR}$  spectrum of compound 3.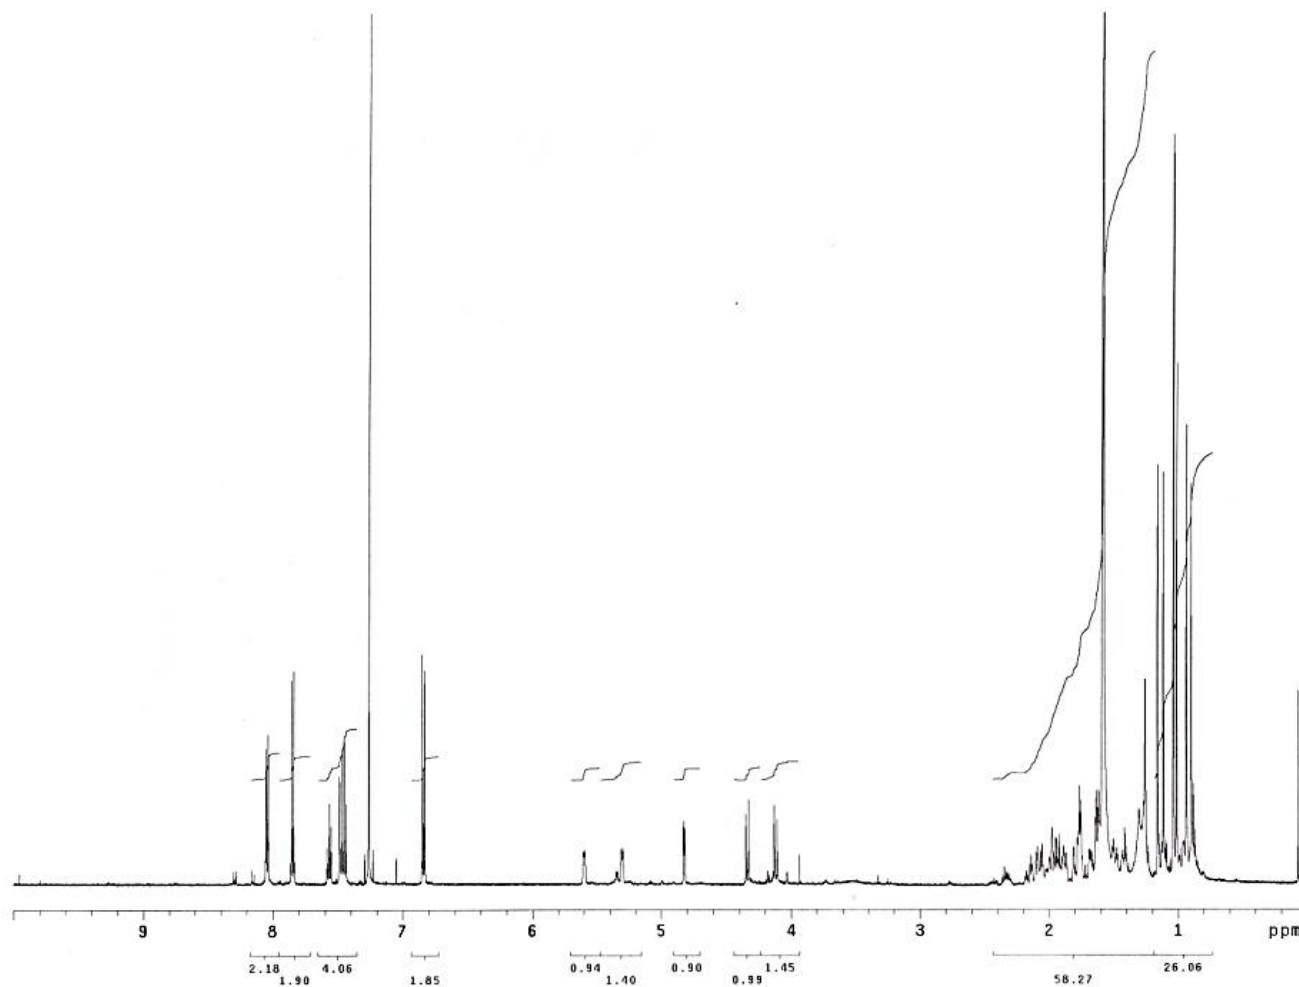

Figure S18.  $^{13}\text{C}$ -NMR spectrum of compound 3.

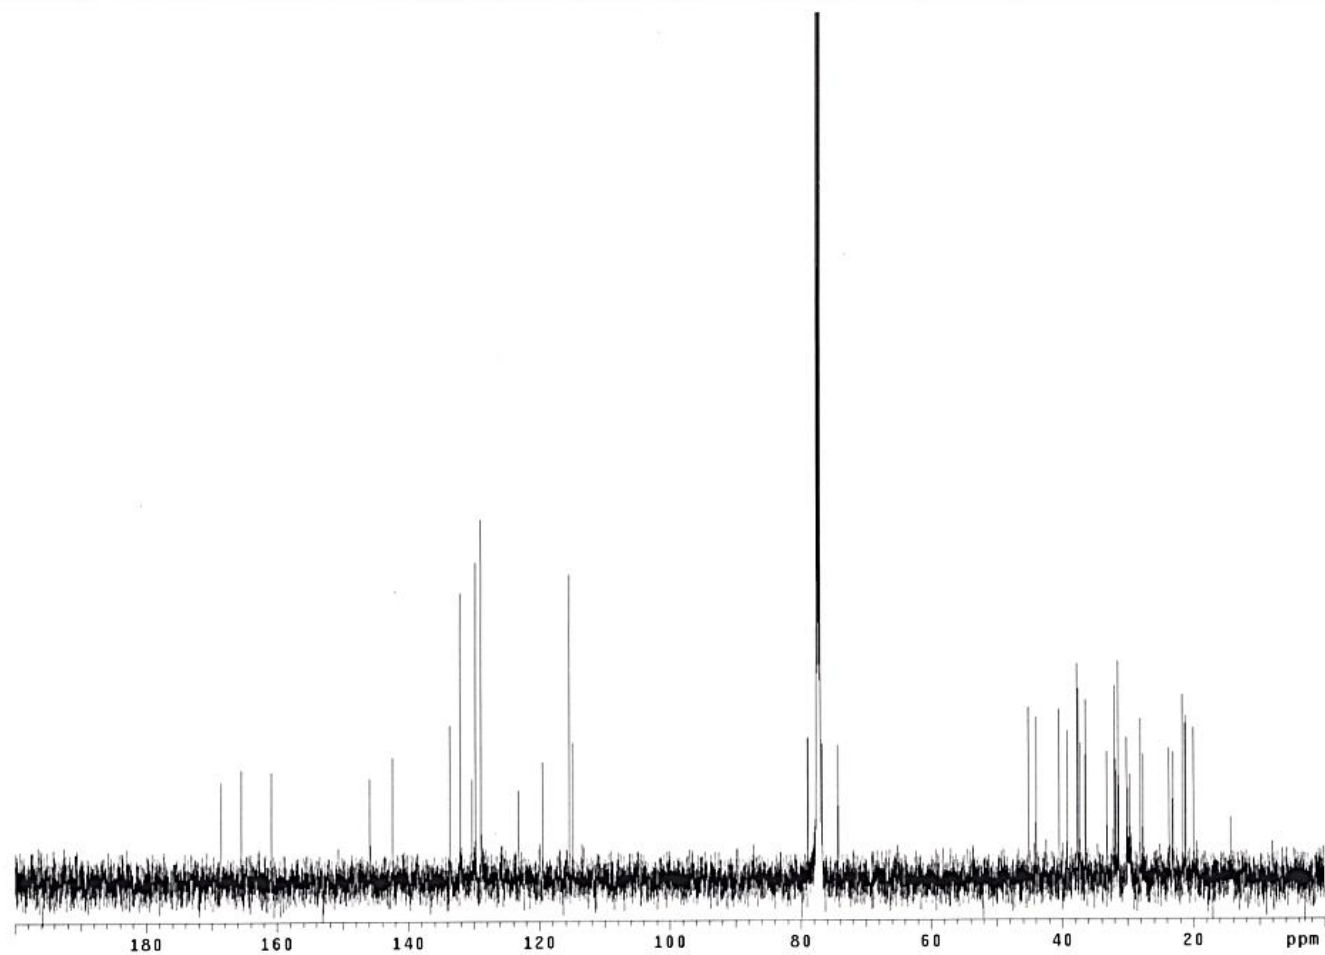

Figure S19. HSQC spectrum of compound 3.

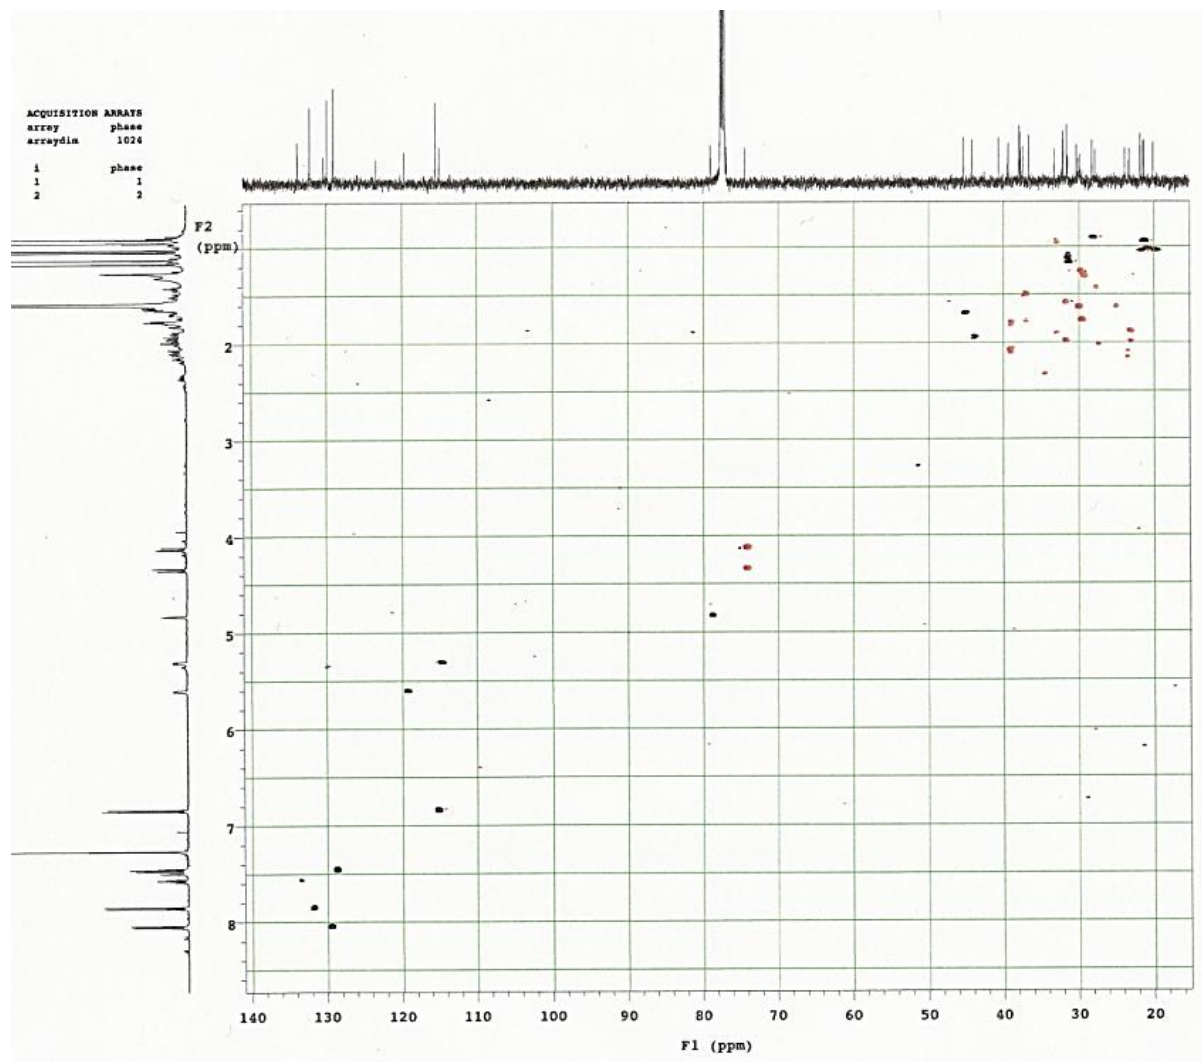

Figure S20. HMBC spectrum of compound 3.

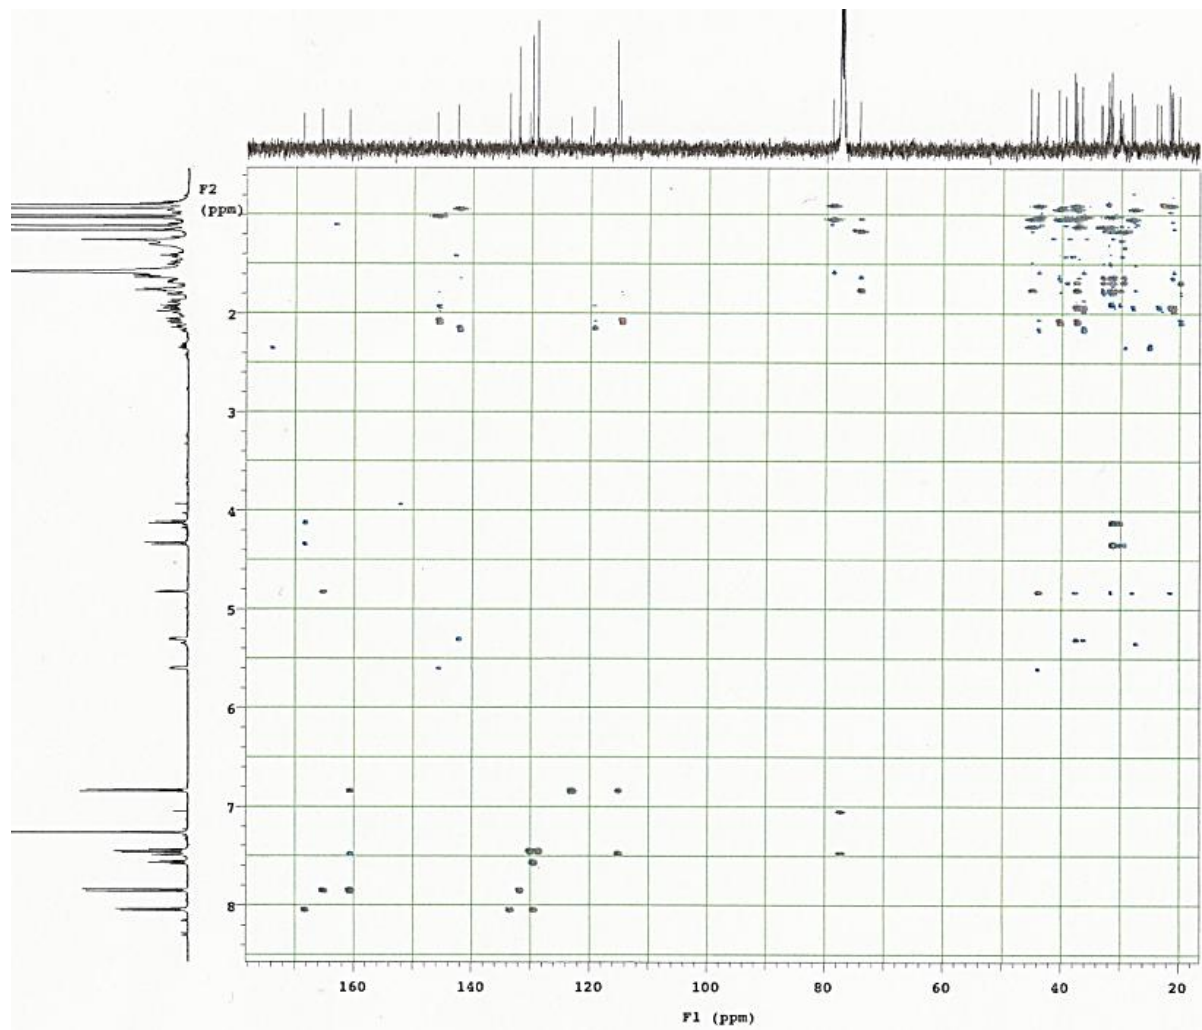



**Figure S21.**  $^1\text{H}$ - $^1\text{H}$  COSY spectrum of compound 3.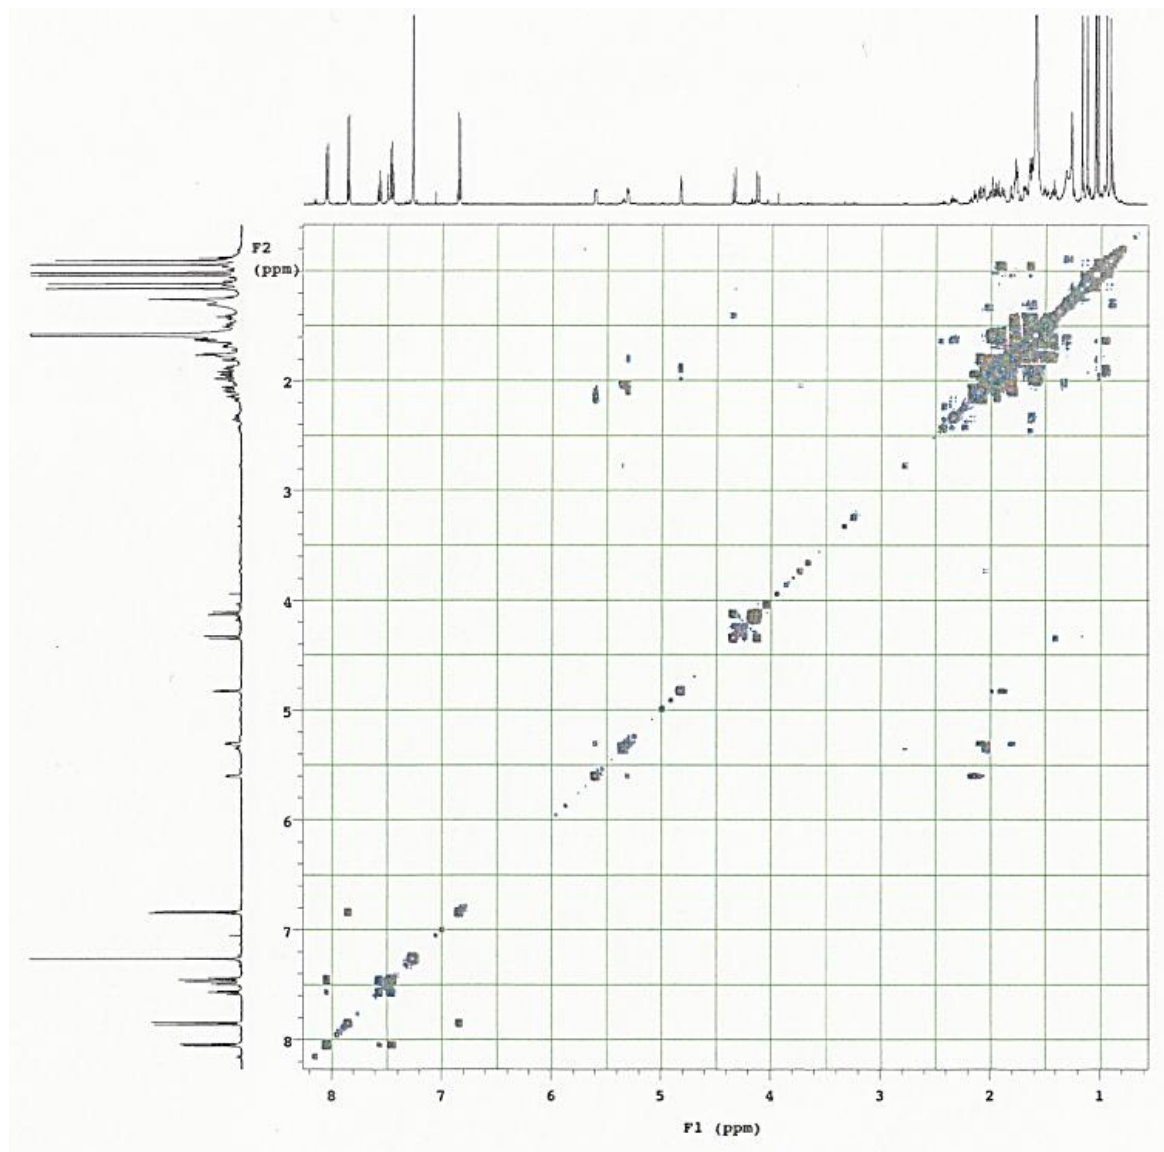

Figure S22. NOESY spectrum of compound 3.

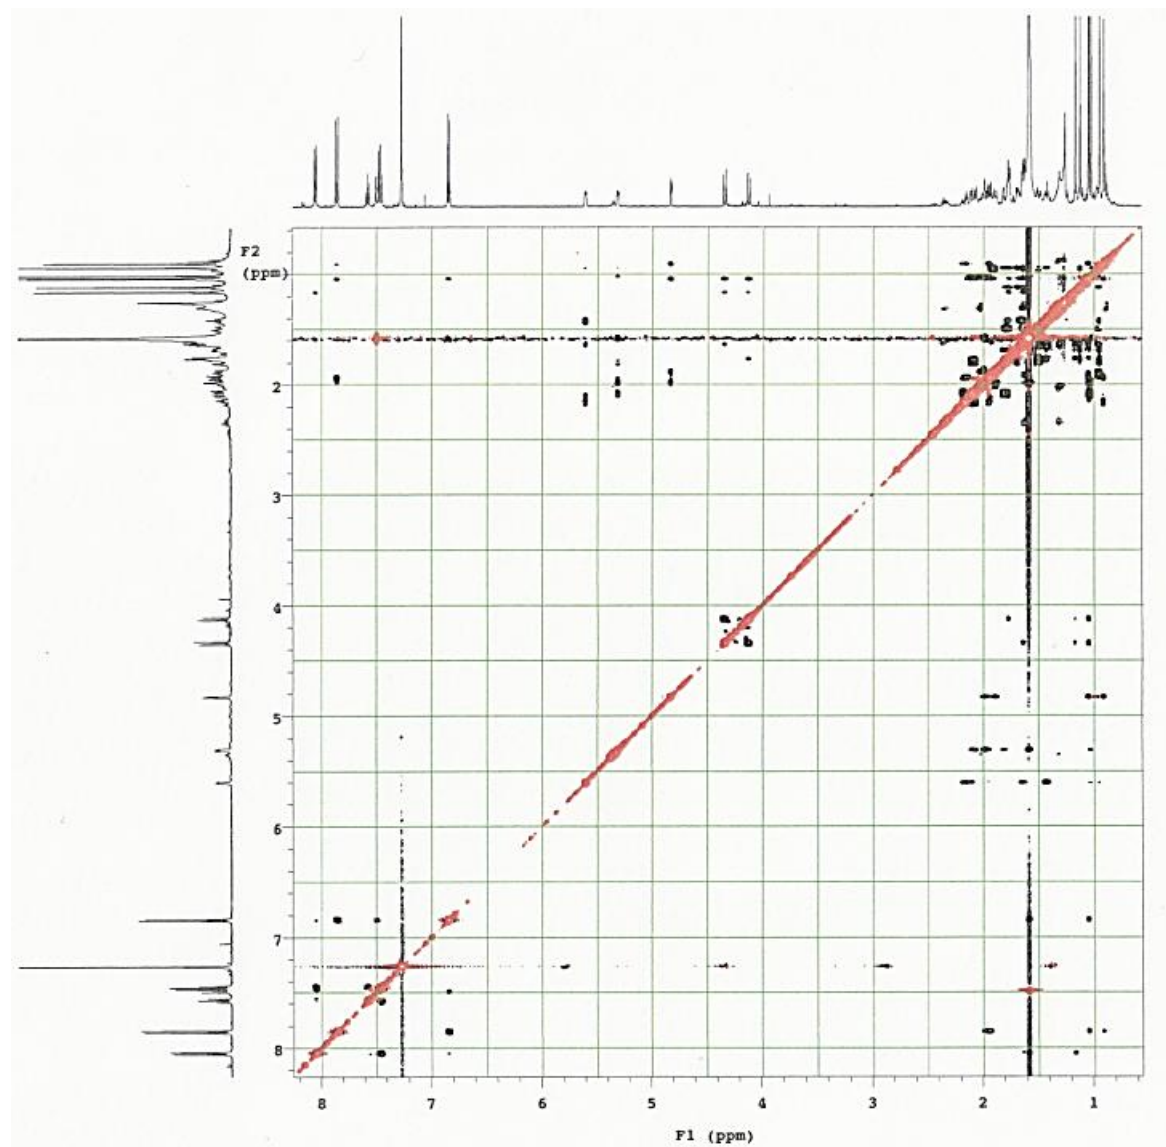

Figure S23. EIMS of compound 3.

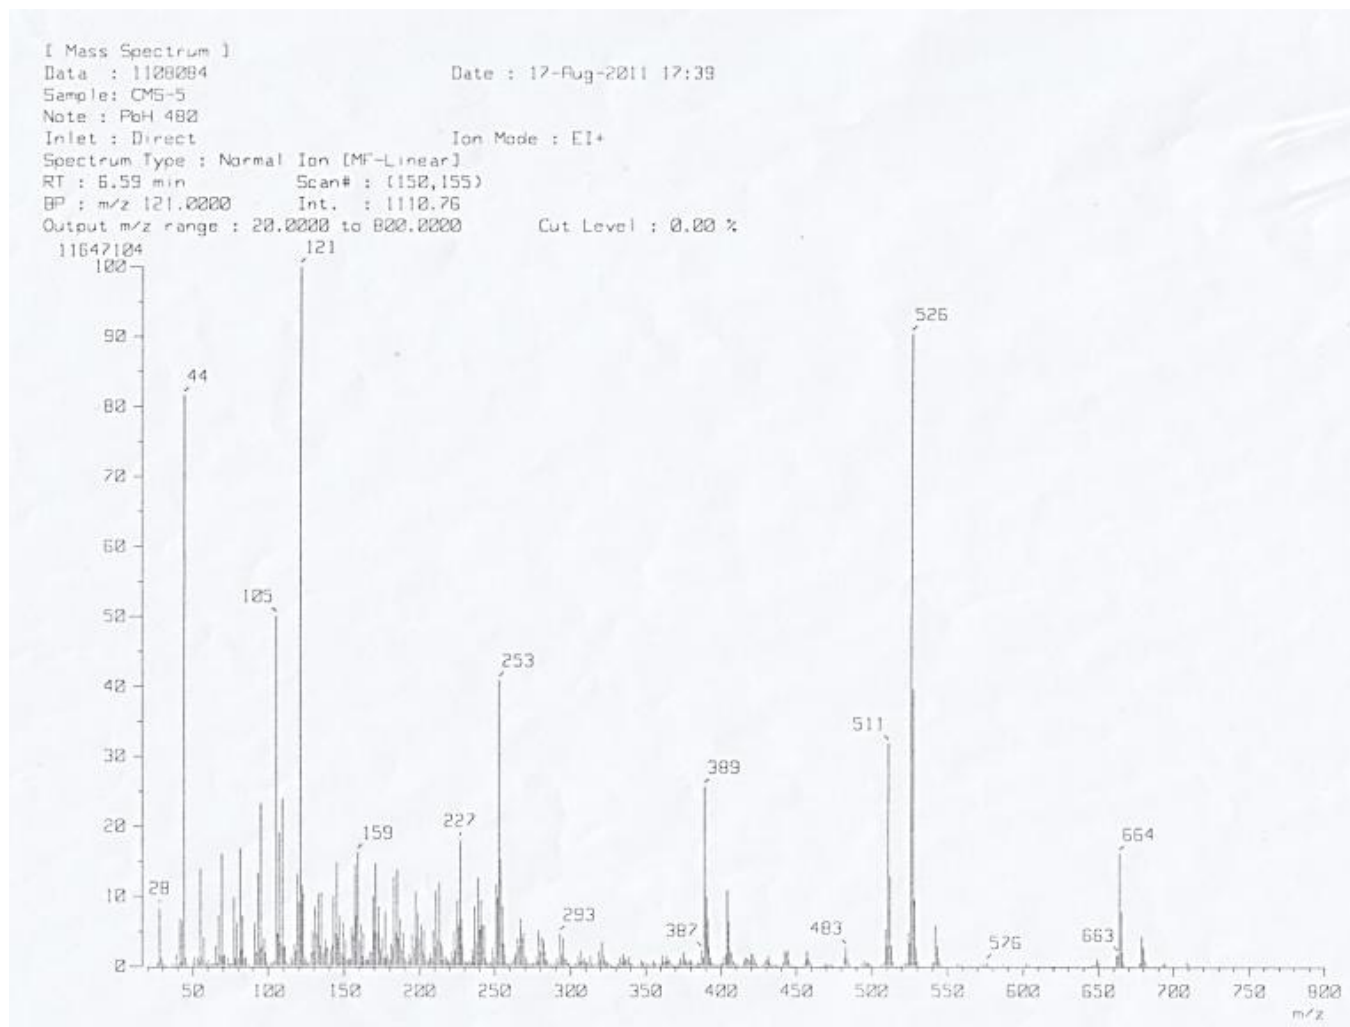

Figure S24. HREIMS of compound 3.

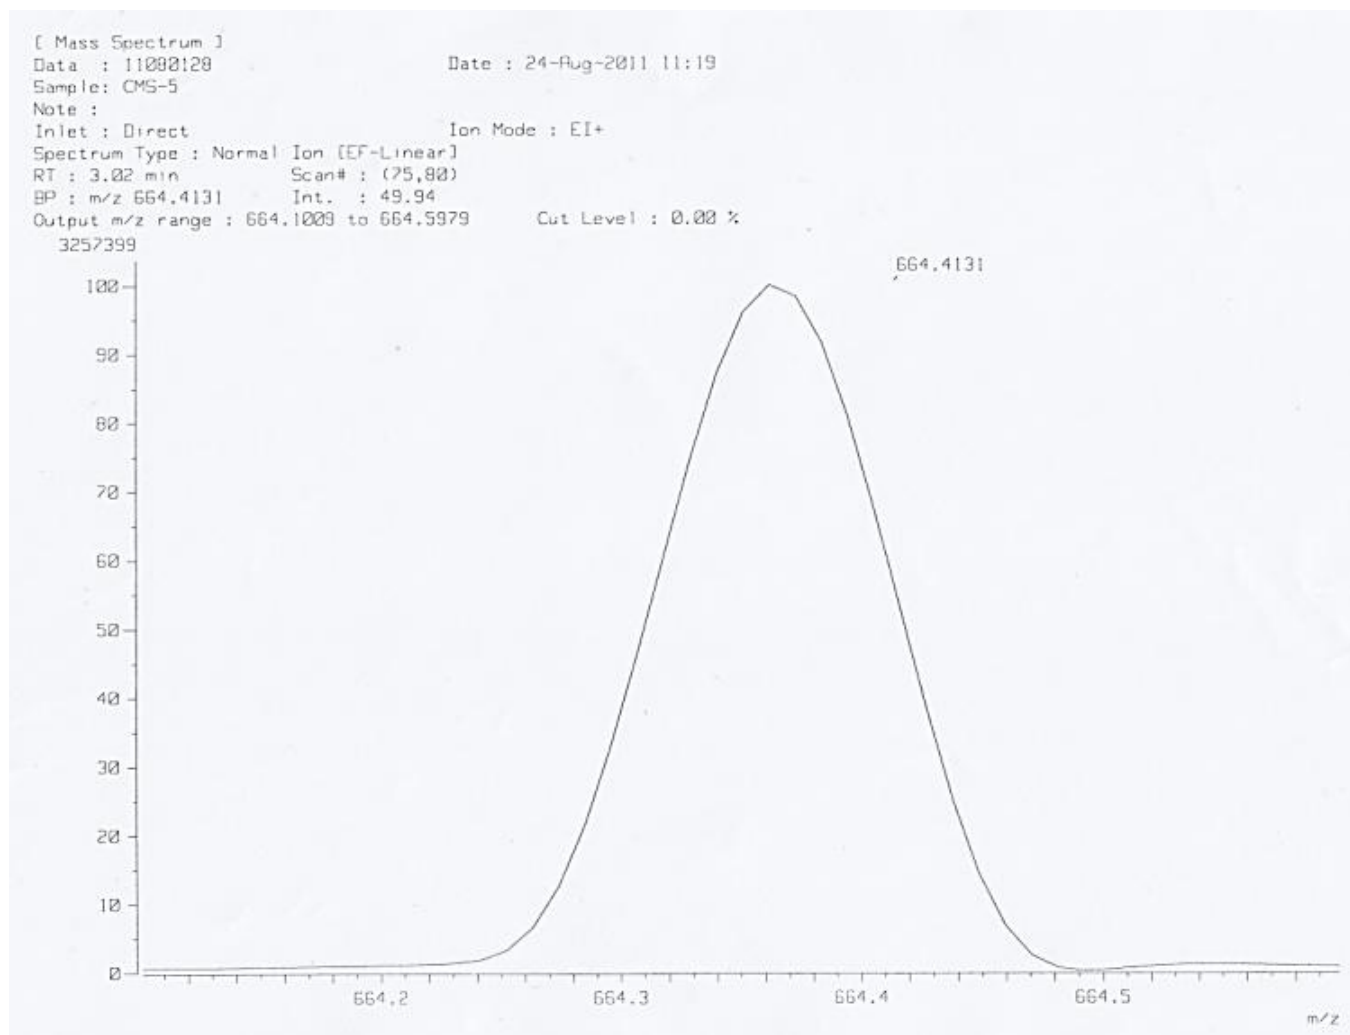

Supplement: molecules-18-05568-s001.pdf [file molecules-18-05568-s001.pdf]
